# Supplementary material for: Genome-Wide Variation in Potyviruses
Source: Front Plant Sci. 2019 Nov 12;10:1439. doi: 10.3389/fpls.2019.01439 (PMC6863122; doi:10.3389/fpls.2019.01439)
Supplement: Supplementary Table S3 — Single Nucelotide Polymorphism (SNPs) by 50-nt bins for 79 Potyviruses with three or more accessions. [file Table_3.xlsx]

## Sheet: Sheet1
Agropyron Mosaic Virus (AMV)	9842	Agropyron Mosaic Virus (AMV)		Agropyron Mosaic Virus (AMV)	3174
Asparagus virus 1	9741	Asparagus virus 1		Asparagus virus 1	3112
Banana Bract Mosaic Virus (BBMV)	9713	Banana Bract Mosaic Virus (BBMV)		Banana Bract Mosaic Virus (BBMV)	3125
Basella Rugose Mosaic Virus (BRMV)	9882	Basella Rugose Mosaic Virus (BRMV)		Basella Rugose Mosaic Virus (BRMV)	3079
Bean Common Mosaic Necrosis Virus (BCMNV)	9893	Bean Common Mosaic Necrosis Virus (BCMNV)		Bean Common Mosaic Necrosis Virus (BCMNV)	3071
Bean common mosaic virus (BCMV)	10086	Bean common mosaic virus (BCMV)		Bean common mosaic virus (BCMV)	3226
Bean Yellow Mosaic Virus (BYMV)	9548	Bean Yellow Mosaic Virus (BYMV)		Bean Yellow Mosaic Virus (BYMV)	3057
Beet mosaic virus (BMV)	9591	Beet mosaic virus (BMV)		Beet mosaic virus (BMV)	3058
Bidens mottle virus	9741	Bidens mottle virus		Bidens mottle virus	3071
Blue squill virus A	9842	Blue squill virus A		Blue squill virus A	3087
Calla lily latent virus	9731	Calla lily latent virus		Calla lily latent virus	3104
Canna yellow streak virus	9502	Canna yellow streak virus		Canna yellow streak virus	3040
Carrot thin leaf virus	9491	Carrot thin leaf virus		Carrot thin leaf virus	3066
Catharanthus mosaic virus	9636	Catharanthus mosaic virus		Catharanthus mosaic virus	3054
Celery mosaic virus	10000	Celery mosaic virus		Celery mosaic virus	3181
Chiili Veinal Mottel Virus (CVMV)	9741	Chiili Veinal Mottel Virus (CVMV)		Chiili Veinal Mottel Virus (CVMV)	3089
Chilli ringspot virus	9652	Chilli ringspot virus		Chilli ringspot virus	3086
Clover Yellow Vein Virus (CYVV)	9585	Clover Yellow Vein Virus (CYVV)		Clover Yellow Vein Virus (CYVV)	3072
Cocksfoot Streak Virus (CSV)	9663	Cocksfoot Streak Virus (CSV)		Cocksfoot Streak Virus (CSV)	3089
Cucurbit vein banding virus	9969	Cucurbit vein banding virus		Cucurbit vein banding virus	3168
Cyrtanthus elatus virus A	9942	Cyrtanthus elatus virus A		Cyrtanthus elatus virus A	3102
Dasheen Mosaic Virus (DasMV)	10038	Dasheen Mosaic Virus (DasMV)		Dasheen Mosaic Virus (DasMV)	3190
East Asian Passiflora Virus (EAPV)	10169	East Asian Passiflora Virus (EAPV)		East Asian Passiflora Virus (EAPV)	3224
Habenaria mosaic virus	9499	Habenaria mosaic virus		Habenaria mosaic virus	3054
Hardenbergia mosaic virus	9682	Hardenbergia mosaic virus		Hardenbergia mosaic virus	3082
Iranian johnsongrass mosaic virus	9544	Iranian johnsongrass mosaic virus		Iranian johnsongrass mosaic virus	3054
Japanese yam mosaic virus (JYMV)	9760	Japanese yam mosaic virus (JYMV)		Japanese yam mosaic virus (JYMV)	3134
Jasmine virus T	9660	Jasmine virus T		Jasmine virus T	3073
Johnsongrass mosaic virus (JGMV)	9874	Johnsongrass mosaic virus (JGMV)		Johnsongrass mosaic virus (JGMV)	3070
Leek Yellow Stripe Virus (LYSV)	10341	Leek Yellow Stripe Virus (LYSV)		Leek Yellow Stripe Virus (LYSV)	3221
Lettuce mosaic virus (LMV)	10080	Lettuce mosaic virus (LMV)		Lettuce mosaic virus (LMV)	3255
Lily Mottle Virus (LiMV)	9648	Lily Mottle Virus (LiMV)		Lily Mottle Virus (LiMV)	3096
Maize dwarf mosaic virus (MDMV)	9554	Maize dwarf mosaic virus (MDMV)		Maize dwarf mosaic virus (MDMV)	3054
Moroccan Watermelon Mosaic Virus (MWMV)	9730	Moroccan Watermelon Mosaic Virus (MWMV)		Moroccan Watermelon Mosaic Virus (MWMV)	3124
Narcissus Degeneration Virus (NDV)	9816	Narcissus Degeneration Virus (NDV)		Narcissus Degeneration Virus (NDV)	3184
Narcissus late season yellows virus	9687	Narcissus late season yellows virus		Narcissus late season yellows virus	3098
Narcissus yellow strip virus (NYSV)	9654	Narcissus yellow strip virus (NYSV)		Narcissus yellow strip virus (NYSV)	3106
Onion yellow dwarf virus (OYDV)	10552	Onion yellow dwarf virus (OYDV)		Onion yellow dwarf virus (OYDV)	3403
Ornithogalum mosaic virus	9447	Ornithogalum mosaic virus		Ornithogalum mosaic virus	3015
Papaya Leaf Distortion Mosaic Virus (PLDMV)	10155	Papaya Leaf Distortion Mosaic Virus (PLDMV)		Papaya Leaf Distortion Mosaic Virus (PLDMV)	3269
Papaya ringspot virus (PRSV)	10349	Papaya ringspot virus (PRSV)		Papaya ringspot virus (PRSV)	3358
Passion fruit woodiness virus	9689	Passion fruit woodiness virus		Passion fruit woodiness virus	3086
Pea Seed-Borne Mosaic Virus (PSBMV)	9939	Pea Seed-Borne Mosaic Virus (PSBMV)		Pea Seed-Borne Mosaic Virus (PSBMV)	3206
Peanut mottle virus (PMV)	9734	Peanut mottle virus (PMV)		Peanut mottle virus (PMV)	3099
Peanut Stripe virus (PSV)	10086	Peanut Stripe virus (PSV)		Peanut Stripe virus (PSV)	3222
Pennisetum mosaic virus (PeMV)	9613	Pennisetum mosaic virus (PeMV)		Pennisetum mosaic virus (PeMV)	3065
Pepper mottle virus (PepMV)	9717	Pepper mottle virus (PepMV)		Pepper mottle virus (PepMV)	3068
Pepper Veinal Mottel Virus (PVMV)	9812	Pepper Veinal Mottel Virus (PVMV)		Pepper Veinal Mottel Virus (PVMV)	3074
Peru Tomato Mosaic Virus (PTMV)	9899	Peru Tomato Mosaic Virus (PTMV)		Peru Tomato Mosaic Virus (PTMV)	3065
Plum pox virus (PPV)	9975	Plum pox virus (PPV)		Plum pox virus (PPV)	3143
Pokeweed mosaic virus	9527	Pokeweed mosaic virus		Pokeweed mosaic virus	3056
Potato virus A (PVA)	9605	Potato virus A (PVA)		Potato virus A (PVA)	3059
Potato virus V (PVV)	9904	Potato virus V (PVV)		Potato virus V (PVV)	3066
Potato virus Y (PVY)	9773	Potato virus Y (PVY)		Potato virus Y (PVY)	3081
Potato virus Y strain NTN	9706	Potato virus Y strain NTN		Potato virus Y strain NTN	3062
Shallot Yellow Stripe Virus (SYSV)	10429	Shallot Yellow Stripe Virus (SYSV)		Shallot Yellow Stripe Virus (SYSV)	3401
Sorghum mosaic virus (SMV)	9652	Sorghum mosaic virus (SMV)		Sorghum mosaic virus (SMV)	3079
Soybean mosaic virus (SMV)	10044	Soybean mosaic virus (SMV)		Soybean mosaic virus (SMV)	3219
Sugarcane mosaic virus (SCMV)	9640	Sugarcane mosaic virus (SCMV)		Sugarcane mosaic virus (SCMV)	3078
Sunflower chlorotic mottle virus	9965	Sunflower chlorotic mottle virus		Sunflower chlorotic mottle virus	3187
Sweet Potato Feathery Mottel Virus (SPFMV)	11004	Sweet Potato Feathery Mottel Virus (SPFMV)		Sweet Potato Feathery Mottel Virus (SPFMV)	3553
Sweet potato latent virus	10081	Sweet potato latent virus		Sweet potato latent virus	3247
Sweet potato virus 2	10732	Sweet potato virus 2		Sweet potato virus 2	3466
Sweet potato virus C	10832	Sweet potato virus C		Sweet potato virus C	3481
Sweet potato virus G	10798	Sweet potato virus G		Sweet potato virus G	3488
Tamarillo leaf malformation virus	9720	Tamarillo leaf malformation virus		Tamarillo leaf malformation virus	3073
Thunberg Fritillary Virus (TFV)	9723	Thunberg Fritillary Virus (TFV)		Thunberg Fritillary Virus (TFV)	3129
Tobacco etch virus (TEV)	9539	Tobacco etch virus (TEV)		Tobacco etch virus (TEV)	3054
Tobacco Vein Bandling Mosaic Virus (TVBMV)	9596	Tobacco Vein Bandling Mosaic Virus (TVBMV)		Tobacco Vein Bandling Mosaic Virus (TVBMV)	3079
Tobacco Vein Mottling Virus (TVMV)	9475	Tobacco Vein Mottling Virus (TVMV)		Tobacco Vein Mottling Virus (TVMV)	3023
Tomato necrotic stunt virus	10057	Tomato necrotic stunt virus		Tomato necrotic stunt virus	3132
Turnip mosaic virus (TuMV)	9844	Turnip mosaic virus (TuMV)		Turnip mosaic virus (TuMV)	3164
Watermelon Mosaic Virus (WMV)	10145	Watermelon Mosaic Virus (WMV)		Watermelon Mosaic Virus (WMV)	3225
Wild Tomato Mosiac Virus (WTMV)	9696	Wild Tomato Mosiac Virus (WTMV)		Wild Tomato Mosiac Virus (WTMV)	3075
Yam mild mosaic virus	9538	Yam mild mosaic virus		Yam mild mosaic virus	3084
Yam Mosaic Virus (YMV)	9759	Yam Mosaic Virus (YMV)		Yam Mosaic Virus (YMV)	3103
Zantedeschia Mild Mosaic Virus (ZMMV)	9973	Zantedeschia Mild Mosaic Virus (ZMMV)		Zantedeschia Mild Mosaic Virus (ZMMV)	3176
Zucchini tigre mosaic virus	10346	Zucchini tigre mosaic virus		Zucchini tigre mosaic virus	3349
Zucchini yellow mosaic virus (ZYMV)	9656	Zucchini yellow mosaic virus (ZYMV)		Zucchini yellow mosaic virus (ZYMV)	3102

## Sheet: sorted_list
Table 1. Nucleotide and polyprotein features of Potyviruses and other viruses used in this study. The total number of accessions and available in NCBI, and the number of accessions containing at least 95% of the genome or polyprotein is indicated
	Potyviruses	Date	Reference	Nucleotide				Polyprotein
				Length (nt)	Total # Accessions	NT Length as 95%	>= 95%	Length (AA)	Total # Accessions	Protein Length as 95%	>= 95%
	Algerian Watermelon Mosaic Virus (AWMV)	43138	EU410442.1	9842	2*	9349.9	2*	3174	13	3015.3	2*
	Asparagus virus 1	43150	NC_025821.1	9741	22	9253.95	3	3112	22	2956.4	3
	Banana Bract Mosaic Virus (BBMV)	43138	KT456531.1	9713	141	9227.35	4	3125	149	2968.75	4
	Basella Rugose Mosaic Virus (BRMV)	43138	DQ851494.1	9882	6	9387.9	4	3079	17	2925.05	4
	Bean Common Mosaic Necrosis Virus (BCMNV)	43138	AY864314.2	9893	34	9398.35	13	3071	46	2917.45	14
	Bean common mosaic virus (BCMV)	43131	U34972.1	10086	361	9581.7	63	3226	356	3064.7	63
	Bean Yellow Mosaic Virus (BYMV)	43138	JN692500.2	9548	265	9070.6	48	3057	269	2904.15	49
	Beet mosaic virus (BMV)	43131	NC_005304.1	9591	18	9111.45	5	3058	31	2905.1	6
	Bidens mottle virus 19	43150	NC_014325.1	9741	19	9253.95	7	3071	31	2917.45	7
	Blackeye cowpea mosaic Virus (BCMV)	43138	AY575773.1	9992	18	9492.4	1*	3202	15	3041.9	1*
	Blue squill virus A 4	43150	JQ807999.1	9842	4	9349.9	3	3087	16	2932.65	3
	Calla lily latent virus 10	43150	EF105297.1	9731	10	9244.45	4	3104	11	2948.8	4
	Canna yellow streak virus 26	43150	NC_013261.1	9502	26	9026.9	11	3040	38	2888	11
	Carrot thin leaf virus 4	43150	NC_025254.1	9491	4	9016.45	3	3066	5	2912.7	3
	Catharanthus mosaic virus 4	43150	KP742991.1	9636	4	9154.2	3	3054	6	2901.3	3
	Celery mosaic virus 11	43150	MF962880.1	10000	11	9500	3	3181	23	3021.95	3
	Chiili Veinal Mottel Virus (CVMV)	43138	KC711055.1	9741	134	9253.95	14	3089	141	2934.55	12
	Chilli ringspot virus 13	43150	KX258620.1	9652	13	9169.4	5	3086	25	2931.7	5
	Clover Yellow Vein Virus (CYVV)	43138	KU922565.1	9585	46	9105.75	8	3072	58	2918.4	7
	Cocksfoot Streak Virus (CSV)	43138	AF499738.1	9663	21	9179.85	3	3089	32	2934.55	3
	Cowpea Aphid-Born Mosaic Virus (CABMV)	43138	X00206.1	5889	33	5594.55	2*	1866	46	1772.7	3*
	Cucurbit vein banding virus 3	43150	KY657266.1	9969	3	9470.55	3	3168	17	3009.6	3
	Cyrtanthus elatus virus A 6	43150	KX575832.1	9942	6	9444.9	3	3102	18	2946.9	3
	Daphne Mosaic Virus (DapMV)	43138	DQ299908.1	9548	3	9070.6	2*	3071	14	2917.45	2*
	Dasheen Mosaic Virus (DasMV)	43138	AJ298033.1	10038	82	9536.1	7	3190	93	3030.5	7
	East Asian Passiflora Virus (EAPV)	43138	KY614052.1	10169	56	9660.55	26	3224	67	3062.8	26
	Freesia mosaic virus 8	43150	GU214748.1	9489	8	9014.55	3	3078	20	2924.1	3
	Fritillary Virus Y (FVY)	43138	AM039800.1	9656	2*	9173.2	2*	3078	13	2924.1	2*
	Habenaria mosaic virus 3	43150	NC_021786.1	9499	3	9024.05	3	3054	16	2901.3	3
	Hardenbergia mosaic virus 47	43150	HQ161081.1	9682	47	9197.9	9	3082	59	2927.9	9
	Hippeastrum mosaic virus 12	43150	JQ723474.1	9660	12	9177	3	3156	24	2998.2	3
	Iranian johnsongrass mosaic virus 16	43150	KT899778.1	9544	16	9066.8	3	3054	17	2901.3	3
	Japanese yam mosaic virus (JYMV)	43137	AB027007.1	9760	41	9272	8	3134	51	2977.3	9
	Jasmine virus T 5	43150	KX398054.1	9660	5	9177	4	3073	13	2919.35	4
	Johnsongrass mosaic virus (JGMV)	43132	KT289893.1	9874	37	9380.3	5	3070	51	2916.5	5
	Konjac Mosaic Virus (KMV)	43137	AB219545.1	9544	19	9066.8	2*	3088	28	2933.6	2*
	Leek Yellow Stripe Virus (LYSV)	43138	KP258216.1	10341	187	9823.95	17	3221	189	3059.95	13
	Lettuce mosaic virus (LMV)	43132	AJ278854.1	10080	288	9576	32	3255	305	3092.25	32
	Lily Mottle Virus (LiMV)	43138	AM048875.1	9648	108	9165.6	9	3096	115	2941.2	7
	Maize dwarf mosaic virus (MDMV)	43132	FM883164.2	9554	238	9076.3	9	3054	246	2901.3	9
	Moroccan Watermelon Mosaic Virus (MWMV)	43138	EF579955.1	9730	25	9243.5	5	3124	38	2967.8	5
	Narcissus Degeneration Virus (NDV)	43138	AM182028.1	9816	9	9325.2	3	3184	20	3024.8	3
	Narcissus late season yellows virus 20	43150	NC_023628.1	9687	20	9202.65	4	3098	30	2943.1	4
	Narcissus yellow strip virus (NYSV)	43137	JQ911732.1	9654	11	9171.3	5	3106	22	2950.7	5
	Onion yellow dwarf virus (OYDV)	43132	HQ258894.1	10552	224	10024.4	10	3403	209	3232.85	10
	Ornithogalum mosaic virus 40	43150	JQ807996.1	9447	40	8974.65	6	3015	53	2864.25	6
	Papaya Leaf Distortion Mosaic Virus (PLDMV)	43138	NC_005028.1	10155	17	9647.25	7	3269	28	3105.55	7
	Papaya ringspot virus (PRSV)	43131	KP462721.1	10349	1130	9831.55	55	3358	1073	3190.1	56
	Passion fruit woodiness virus 29	43150	KX577780.1	9689	29	9204.55	4	3086	42	2931.7	4
	Pea Seed-Borne Mosaic Virus (PSBMV)	43138	KU870637.1	9939	66	9442.05	5	3206	77	3045.7	6
	Peace lily mosaic virus (PLMV)	43138	DQ851494.1	9882	1	9387.9	1*	3079	1	2925.05	1*
	Peanut mottle virus (PMV)	43131	KU708532.1	9734	23	9247.3	6	3099	36	2944.05	7
	Peanut Stripe virus (PSV)	43138	U34972.1	10086	116	9581.7	5	3222	117	3060.9	5
	Pennisetum mosaic virus (PeMV)	43132	JX070139.1	9613	34	9132.35	23	3065	45	2911.75	23
	Pepper mottle virus (PepMV)	43131	AF501591.1	9717	64	9231.15	24	3068	75	2914.6	22
	Pepper Severe Mosaic Virus (PSMV)	43138	AM181350.1	9890	4	9395.5	2*	3077	16	2923.15	2*
	Pepper Veinal Mottel Virus (PVMV)	43138	FJ617225.2	9812	23	9321.4	5	3074	32	2920.3	4
	Peru Tomato Mosaic Virus (PTMV)	43138	AJ437280.1	9899	18	9404.05	3	3065	28	2911.75	3
	Plum pox virus (PPV)	43131	AY184478.1	9975	1498	9476.25	159	3143	1507	2985.85	158
	Pokeweed mosaic virus 6	43150	KU133475.1	9527	6	9050.65	6	3056	17	2903.2	6
	Potato virus A (PVA)	43131	AJ131403.1	9605	96	9124.75	15	3059	105	2906.05	16
	Potato virus V (PVV)	43138	KP849483.1	9904	64	9408.8	6	3066	62	2912.7	6
	Potato virus Y (PVY)	43131	FJ214726.1	9773	2880	9284.35	449	3081	2845	2926.95	440
	Potato virus Y strain NTN 35	43150	AJ890347.1	9706	35	9220.7	13	3062	36	2908.9	13
	Scallion mosaic virus (ScMV)	43137	AJ316084.1	9324	5	8857.8	2*	3001	16	2850.95	2*
	Shallot Yellow Stripe Virus (SYSV)	43138	AJ865076.1	10429	25	9907.55	3	3401	39	3230.95	6
	Sorghum mosaic virus (SMV)	43132	KM025054.1	9652	417	9169.4	22	3079	421	2925.05	22
	Soybean mosaic virus (SMV)	43131	KC845322.1	10044	494	9541.8	101	3219	577	3058.05	123
	Sudan watermelon mosaic virus 41	43150	KY623505.1	10232	41	9720.4	2*	3295	42	3130.25	2*
	Sugarcane mosaic virus (SCMV)	43132	KP860936.1	9640	1058	9158	91	3078	1037	2924.1	91
	Sunflower chlorotic mottle virus 9	43150	GU181199.	9965	9	9466.75	5	3187	21	3027.65	5
	Sweet Potato Feathery Mottel Virus (SPFMV)	43137	FJ155666.1	11004	344	10453.8	28	3553	365	3375.35	28
	Sweet potato latent virus 60	43150	KP115613.1	10081	60	9576.95	6	3247	61	3084.65	6
	Sweet potato virus 2 16	43150	KX017447.1	10732	16	10195.4	11	3466	30	3292.7	11
	Sweet potato virus C 79	43150	MF572064.1	10832	79	10290.4	22	3481	93	3306.95	22
	Sweet potato virus G 132	43150	NC_018093.1	10798	132	10258.1	12	3488	142	3313.6	12
	Tamarillo leaf malformation virus 24	43150	NC_026615.1	9720	24	9234	3	3073	32	2919.35	3
	Telosma Mosaic Virus (TeMV)	43138	DQ851493.1	9689	13	9204.55	2*	3082	24	2927.9	2*
	Thunberg Fritillary Virus (TFV)	43138	AJ851866.1	9723	5	9236.85	3	3129	16	2972.55	3
	Tobacco etch virus (TEV)	43131	DQ986288	9539	181	9062.05	10	3054	175	2901.3	12
	Tobacco Vein Bandling Mosaic Virus (TVBMV)	43138	KY499622.1	9596	159	9116.2	18	3079	165	2925.05	15
	Tobacco Vein Mottling Virus (TVMV)	43138	U38621.1	9475	12	9001.25	3	3023	27	2871.85	4
	Tomato necrotic stunt virus 3	43150	NC_017824.1	10057	3	9554.15	3	3132	15	2975.4	3
	Turnip mosaic virus (TuMV)	43131	AY227024.1	9844	1667	9351.8	483	3164	1658	3005.8	485
	Verbena Virus Y (VVY)	43138	EU564817.1	9742	2*	9254.9	2*	3105	13	2949.75	2*
	Watermelon Mosaic Virus (WMV)	43138	KT992083.1	10145	691	9637.75	86	3225	702	3063.75	86
	White Lupin mosaic virus(WLMV)	43138	DQ641248.1	9512	1*	9036.4	1*	3056	1*	2903.2	1*
	Wild Potato Mosiac Virus (WPMV)	43138	AJ437279.1	9878	2*	9384.1	2*	3065	12	2911.75	2*
	Wild Tomato Mosiac Virus (WTMV)	43138	KM401435.1	9696	12	9211.2	3	3075	23	2921.25	3
	Wisteria Vein Mosaic Virus (WVMV)	43138	AY656816.1	9695	12	9210.25	2*	3092	22	2937.4	2*
	Yam mild mosaic virus 115	43150	NC_019412.1	9538	115	9061.1	13	3084	136	2929.8	13
	Yam Mosaic Virus (YMV)	43137	DI144620.1	9759	77	9271.05	3	3103	95	2947.85	1*
	Zantedeschia Mild Mosaic Virus (ZMMV)	43138	AY626825.4	9973	10	9474.35	3	3176	21	3017.2	3
	Zucchini tigre mosaic virus 35	43150	KC345608.1	10346	35	9828.7	5	3349	45	3181.55	5
	Zucchini yellow mosaic virus (ZYMV)	43138	KY225544.1	9656	1190	9173.2	90	3102	1152	2946.9	87

## Sheet: Nucelotide
	Agropyron Mosaic Virus (AMV)	Asparagus virus 1	Banana Bract Mosaic Virus (BBMV)	Basella Rugose Mosaic Virus (BRMV)	Bean Common Mosaic Necrosis Virus (BCMNV)	Bean common mosaic virus (BCMV)	Bean Yellow Mosaic Virus (BYMV)	Beet mosaic virus (BMV)	Bidens mottle virus	Blue squill virus A	Calla lily latent virus	Canna yellow streak virus	Carrot thin leaf virus	Catharanthus mosaic virus	Celery mosaic virus	Chiili Veinal Mottel Virus (CVMV)	Chilli ringspot virus	Clover Yellow Vein Virus (CYVV)	Cocksfoot Streak Virus (CSV)	Cucurbit vein banding virus	Cyrtanthus elatus virus A	Dasheen Mosaic Virus (DasMV)	East Asian Passiflora Virus (EAPV)	Habenaria mosaic virus	Hardenbergia mosaic virus	Iranian johnsongrass mosaic virus	Japanese yam mosaic virus (JYMV)	Jasmine virus T	Johnsongrass mosaic virus (JGMV)	Leek Yellow Stripe Virus (LYSV)	Lettuce mosaic virus (LMV)	Lily Mottle Virus (LiMV)	Maize dwarf mosaic virus (MDMV)	Moroccan Watermelon Mosaic Virus (MWMV)	Narcissus Degeneration Virus (NDV)	Narcissus late season yellows virus	Narcissus yellow strip virus (NYSV)	Onion yellow dwarf virus (OYDV)	Ornithogalum mosaic virus	Papaya Leaf Distortion Mosaic Virus (PLDMV)	Papaya ringspot virus (PRSV)	Passion fruit woodiness virus	Pea Seed-Borne Mosaic Virus (PSBMV)	Peanut mottle virus (PMV)	Peanut Stripe virus (PSV)	Pennisetum mosaic virus (PeMV)	Pepper mottle virus (PepMV)	Pepper Veinal Mottel Virus (PVMV)	Peru Tomato Mosaic Virus (PTMV)
0	1	1	1	1	14	29	27	3	1	2	1	1	4	3	18	7	5	2	2	6	1	9	13	2	7	5	20	6	13	27	7	8	4	7	1	6	6	23	15	2	17	4	9	2	1	5	5	4	7
50	0	1	2	15	17	37	34	12	4	3	2	5	2	4	10	29	9	2	4	24	2	41	28	16	21	12	35	6	12	28	24	7	17	10	1	5	17	32	17	13	40	0	18	20	15	17	9	0	14
100	0	1	2	25	18	39	43	16	1	11	0	4	0	1	16	37	5	11	7	21	3	47	33	16	36	7	22	19	25	20	21	13	7	12	0	13	30	31	10	13	36	4	13	23	6	8	11	1	19
150	2	0	2	11	18	23	33	6	0	8	0	3	1	1	4	36	6	2	1	18	0	27	33	13	26	8	40	11	6	37	19	14	11	7	1	14	26	24	23	9	33	1	21	11	5	25	5	1	16
200	1	0	8	15	2	24	40	13	5	9	1	8	2	4	9	34	13	8	3	9	1	24	23	10	26	9	40	10	6	31	18	11	13	8	1	11	25	26	25	15	25	2	13	12	5	20	4	1	14
250	2	0	14	22	5	32	30	9	5	8	0	4	2	2	15	29	15	7	5	16	0	36	21	9	17	11	25	18	10	34	20	6	14	9	0	3	31	27	18	15	31	1	11	15	7	12	8	0	22
300	0	0	5	22	21	35	30	10	2	6	1	19	1	0	9	33	27	5	13	15	2	33	11	13	23	11	33	9	13	25	15	12	19	8	2	18	22	35	29	13	32	0	15	14	5	17	8	1	25
350	1	1	4	21	8	38	32	6	1	7	0	25	0	1	9	29	16	4	12	15	3	37	18	15	22	5	23	7	19	27	18	14	18	5	1	19	21	40	28	16	25	3	21	5	8	23	5	2	11
400	4	0	5	14	0	35	30	11	4	10	0	23	0	4	13	28	18	4	9	6	3	23	10	21	29	16	32	11	20	28	35	9	17	11	7	11	26	40	25	24	33	5	21	10	6	31	9	3	11
450	4	0	8	12	0	29	27	8	2	9	0	11	0	1	11	29	13	7	11	0	2	26	21	8	26	12	33	12	11	30	36	15	16	12	3	17	25	27	19	16	23	2	20	11	4	47	6	0	8
500	8	0	6	24	3	33	42	6	3	7	1	7	0	0	13	24	8	4	15	0	0	21	22	15	23	13	35	6	26	34	28	6	13	8	5	16	35	26	29	25	35	2	25	11	5	38	6	1	13
550	4	1	5	16	1	34	37	8	6	14	3	12	3	1	18	30	10	8	16	0	0	22	17	7	30	6	44	12	20	30	47	26	19	5	3	14	24	37	24	20	36	2	22	14	11	24	4	1	18
600	5	0	9	18	4	25	43	8	4	4	0	12	2	5	7	39	19	13	13	13	0	20	20	7	31	5	30	11	17	38	43	19	20	10	6	10	26	34	22	26	44	1	17	17	5	34	5	0	20
650	1	0	5	26	11	40	38	4	1	13	1	12	3	1	9	32	11	11	7	8	6	15	29	16	22	11	26	11	26	17	27	17	20	15	8	22	32	30	20	29	49	1	29	13	9	21	9	2	18
700	2	0	2	21	4	43	31	4	9	9	1	11	2	1	16	28	13	5	11	13	0	33	13	13	22	9	34	7	22	35	35	15	16	8	6	12	30	31	27	29	41	1	25	13	2	37	7	1	16
750	3	0	2	20	6	28	25	13	3	6	2	11	1	1	7	25	6	9	13	12	0	31	33	11	28	12	37	10	20	33	23	17	18	11	2	13	36	41	18	27	34	1	31	8	5	30	4	1	23
800	1	0	4	14	8	38	22	12	6	7	2	14	1	3	12	30	18	8	10	12	0	8	19	9	22	13	40	15	23	42	47	14	18	8	4	10	39	44	18	27	44	1	25	18	9	28	6	2	14
850	3	0	8	12	6	43	33	11	5	11	0	8	2	1	12	25	8	9	17	13	0	21	19	12	21	10	39	8	18	44	25	19	16	10	1	5	24	41	26	27	45	0	23	14	7	38	9	2	17
900	2	0	4	19	0	28	29	12	3	4	6	9	2	1	11	29	19	7	16	9	0	29	35	9	19	9	31	9	15	44	26	17	19	7	5	12	35	46	19	18	26	0	18	17	7	19	6	1	20
950	3	0	4	16	7	33	29	10	4	5	7	6	0	2	9	25	10	13	17	19	7	30	28	8	20	7	34	4	15	10	29	8	17	11	3	10	23	34	17	19	30	2	18	8	12	19	8	0	14
1000	1	1	6	10	5	41	34	12	0	5	1	10	2	2	10	27	8	3	16	14	0	30	33	9	25	10	29	13	18	35	29	12	18	6	5	12	30	46	17	31	36	0	16	8	2	17	6	0	12
1050	0	0	5	11	1	39	30	9	5	5	0	9	4	1	8	26	8	10	9	8	0	25	30	11	20	10	32	6	14	11	31	15	16	10	3	4	28	37	18	19	39	0	17	15	12	18	2	1	10
1100	0	0	2	9	4	39	22	5	3	7	1	5	0	2	9	23	7	6	10	2	0	39	21	8	22	6	23	6	14	17	24	9	17	12	3	8	27	38	17	15	38	1	18	9	7	22	1	2	10
1150	1	0	3	5	9	43	19	6	4	21	0	9	0	2	8	17	8	11	7	6	0	25	23	10	18	4	31	9	20	26	26	11	15	9	3	10	15	31	22	18	42	0	15	7	6	23	3	1	16
1200	0	0	4	9	3	44	23	11	5	9	0	9	0	1	9	18	10	8	10	13	5	23	23	9	16	8	22	10	16	27	24	11	19	3	1	8	22	26	21	27	33	0	20	10	6	21	6	1	9
1250	2	0	3	18	3	37	26	11	7	11	0	10	0	1	6	31	12	6	5	5	0	21	20	10	18	6	23	6	12	27	25	10	17	7	8	7	18	29	18	24	42	1	13	17	7	18	4	1	13
1300	3	0	5	10	7	39	34	11	2	10	1	7	0	1	8	26	11	5	14	6	0	29	29	13	16	5	19	5	17	32	28	11	17	5	3	6	21	32	19	27	40	1	12	10	7	17	7	0	18
1350	1	2	2	15	2	33	21	10	3	7	0	0	1	2	7	28	13	7	10	11	3	22	20	13	19	11	16	9	17	24	20	16	16	4	3	10	21	20	11	22	32	2	13	6	9	21	2	1	19
1400	0	0	8	15	5	45	31	15	0	9	0	3	2	1	3	21	14	6	8	14	1	24	23	8	23	8	30	5	18	35	19	5	14	4	4	10	28	24	21	36	30	0	15	5	3	23	4	3	14
1450	3	0	5	18	8	35	25	9	2	5	1	1	0	1	8	21	10	6	9	8	0	17	19	7	20	3	24	8	16	25	17	9	12	8	5	10	23	17	12	23	33	1	12	15	4	17	3	0	13
1500	4	0	6	8	2	29	25	9	0	7	0	1	0	1	1	17	9	11	7	13	5	20	14	8	16	8	22	5	15	28	20	8	13	5	4	7	20	34	11	23	32	3	12	8	5	18	6	2	14
1550	2	0	5	12	6	22	23	12	4	6	0	0	0	0	4	14	10	4	7	18	5	15	22	9	18	11	22	8	14	22	18	12	16	5	7	7	17	24	15	17	37	1	13	5	6	21	4	3	7
1600	2	0	4	14	2	25	19	11	5	13	0	0	1	0	1	15	7	3	8	7	0	21	14	8	21	12	22	6	11	37	20	9	16	7	4	13	26	25	10	19	28	2	15	11	5	18	3	2	8
1650	0	1	3	12	7	19	18	5	2	7	0	1	1	2	0	20	7	7	9	0	0	18	18	8	23	10	22	12	20	31	27	6	16	8	3	10	19	18	11	17	27	0	13	10	6	18	5	1	8
1700	2	0	5	8	3	31	20	5	4	8	0	0	2	2	1	16	6	4	8	3	0	15	19	10	16	6	23	7	14	29	24	9	14	6	4	11	16	24	13	13	27	2	12	7	9	15	3	0	4
1750	3	0	5	7	5	22	21	6	3	13	0	0	2	6	1	18	11	7	14	10	0	17	29	9	14	7	17	8	19	33	22	6	13	3	5	9	17	25	15	11	24	1	16	9	5	17	1	1	8
1800	3	0	4	9	4	26	28	8	11	3	0	1	0	0	2	17	9	5	12	12	0	20	27	9	20	4	12	3	16	18	20	14	17	5	2	6	19	23	10	21	25	5	11	6	2	16	2	0	9
1850	1	0	2	11	1	25	20	6	9	6	0	0	1	0	2	20	9	8	11	11	0	19	20	8	14	7	21	11	16	35	19	4	14	5	0	9	30	26	14	20	22	10	18	9	4	13	3	3	7
1900	1	0	4	13	2	37	19	6	4	8	0	0	1	0	2	16	10	2	5	7	7	17	13	9	19	3	32	1	13	20	17	7	12	4	2	11	21	23	12	20	24	17	15	5	5	15	4	2	10
1950	0	0	2	9	4	28	21	6	2	11	0	0	1	3	0	15	7	2	3	6	0	14	22	8	18	7	19	7	10	20	17	10	12	4	0	7	24	29	12	17	22	10	13	10	6	15	2	0	8
2000	1	1	2	5	2	25	24	4	1	2	2	1	0	0	2	14	7	2	6	10	0	17	12	8	16	7	25	5	12	16	16	11	15	4	2	10	15	25	13	12	23	9	13	9	6	19	3	0	14
2050	2	0	3	14	4	17	23	6	1	6	0	1	0	2	0	14	12	3	8	10	0	20	17	10	12	5	18	6	13	19	19	7	16	4	2	10	20	26	16	14	26	7	15	7	1	14	1	2	11
2100	0	0	4	8	3	24	21	6	4	7	0	0	0	3	0	17	7	5	4	10	0	22	12	9	19	3	17	8	15	26	20	6	15	5	1	12	13	20	11	7	19	5	11	9	4	16	2	1	14
2150	2	0	5	8	1	27	15	5	0	7	0	0	0	2	1	13	11	7	9	12	0	17	18	8	13	7	19	5	12	22	19	6	14	5	2	13	16	15	16	11	24	11	12	7	3	16	1	1	8
2200	2	2	1	5	2	23	16	4	3	9	1	0	1	1	0	15	9	5	8	8	0	18	17	7	12	8	15	6	14	25	21	8	10	5	3	12	18	25	12	11	27	13	12	10	3	17	2	0	7
2250	1	0	3	6	3	14	23	6	2	7	0	0	1	2	0	18	5	4	6	10	0	14	12	10	13	4	18	8	19	26	23	10	17	6	0	10	17	26	9	15	19	7	14	4	5	15	0	0	9
2300	1	0	4	8	4	17	22	12	4	8	0	0	2	0	2	11	8	6	12	7	0	15	20	17	15	9	22	6	17	17	19	6	18	6	1	8	21	22	19	18	22	11	10	0	3	18	1	0	14
2350	4	0	1	9	4	22	23	5	4	4	1	0	2	1	4	16	7	6	8	6	9	13	16	12	14	8	18	7	20	17	18	5	17	6	0	11	19	29	17	14	20	9	8	3	3	19	1	0	8
2400	3	0	4	9	2	24	22	5	3	4	0	0	3	0	3	11	4	7	10	7	0	14	15	9	15	7	19	7	12	26	15	9	15	3	2	14	16	21	20	15	19	9	11	11	3	18	3	2	13
2450	2	0	2	13	0	31	32	6	2	8	0	0	1	1	0	23	7	6	7	12	0	15	15	4	10	8	19	5	12	20	15	12	13	5	2	11	17	24	16	14	24	14	9	6	3	13	1	2	11
2500	3	0	6	15	6	19	26	5	4	8	1	0	1	0	1	16	9	6	8	12	0	13	15	13	19	5	23	5	8	23	14	14	18	5	1	12	16	20	12	13	21	8	10	7	7	17	2	1	9
2550	2	1	7	16	1	16	23	11	3	7	1	0	1	2	1	18	11	7	8	8	0	19	14	15	18	12	20	8	11	13	14	8	16	4	0	13	20	16	12	11	20	12	11	6	4	19	3	1	7
2600	1	0	2	14	1	19	23	9	0	11	0	0	3	0	0	25	9	9	9	9	6	15	13	10	14	6	23	7	13	18	17	13	21	5	0	15	14	17	16	12	20	9	10	7	5	20	1	3	7
2650	0	0	1	12	2	21	16	4	1	5	0	0	0	0	0	17	11	8	6	11	2	16	10	8	14	3	25	6	15	22	20	10	17	6	3	10	17	20	18	8	18	14	12	3	3	14	1	0	7
2700	1	0	4	8	4	14	21	4	4	6	1	0	1	0	2	25	13	8	11	14	0	13	13	10	17	5	20	6	11	16	20	11	9	2	7	8	19	17	14	12	18	10	6	4	2	21	4	1	11
2750	1	0	3	11	5	13	21	7	0	1	2	0	2	1	5	22	11	6	7	10	0	23	14	4	19	2	21	4	17	21	15	11	7	3	1	8	17	21	16	11	17	15	15	3	2	4	5	1	11
2800	1	0	5	10	3	17	24	6	4	3	1	0	3	0	4	27	8	7	5	8	0	24	16	5	19	0	22	7	4	28	27	11	7	1	1	14	24	19	13	12	17	18	15	0	7	6	2	0	10
2850	2	0	5	9	2	18	18	8	2	5	3	0	0	0	2	25	6	7	4	7	8	14	19	2	17	2	20	6	7	24	36	9	8	7	2	5	21	31	7	10	16	12	12	5	0	5	2	0	5
2900	0	1	2	10	4	19	19	3	1	1	0	0	0	0	2	11	7	3	0	7	0	20	13	10	16	6	17	3	6	30	23	4	14	8	0	7	19	21	19	9	20	12	15	2	8	9	3	1	10
2950	2	0	2	3	4	23	13	4	1	12	0	1	0	0	1	15	9	5	2	8	0	19	19	22	10	11	18	2	2	22	18	10	11	3	4	8	24	24	18	12	21	5	12	3	8	4	2	0	7
3000	1	0	1	2	3	25	16	3	0	9	0	0	0	3	2	15	3	4	2	7	0	25	17	12	5	7	21	2	7	24	19	6	15	3	4	8	13	20	21	24	19	7	11	5	4	20	2	1	1
3050	1	0	1	4	3	22	15	3	2	5	2	0	1	2	1	12	6	3	3	8	0	23	21	10	12	6	12	10	10	28	19	9	11	0	2	14	18	37	24	14	19	14	19	5	4	21	2	0	4
3100	1	0	3	1	2	23	26	4	5	9	0	1	0	1	1	25	7	8	4	1	0	23	15	8	11	10	20	14	13	23	22	14	17	5	3	23	22	28	17	8	17	7	15	10	4	21	6	3	2
3150	1	1	3	12	6	22	31	7	4	11	2	0	0	3	0	29	10	9	5	17	0	16	16	7	30	6	13	8	15	28	23	15	17	1	1	12	11	41	16	11	20	16	12	4	2	17	5	0	10
3200	3	0	1	11	4	22	26	2	2	9	0	0	1	2	0	19	9	6	12	9	3	14	19	17	18	10	13	8	15	31	21	11	19	8	2	12	40	39	22	16	22	10	7	3	6	27	2	1	3
3250	2	0	2	10	1	29	27	4	5	10	0	1	0	1	0	20	10	6	6	6	0	17	19	15	20	9	44	6	10	23	20	15	14	8	5	12	33	35	25	19	22	5	6	2	4	19	2	4	10
3300	3	1	3	4	1	22	32	14	2	10	0	0	1	0	1	23	3	6	6	5	0	18	19	17	21	10	27	9	20	12	13	14	17	1	3	15	18	39	28	18	19	21	8	9	2	21	3	4	7
3350	4	0	5	10	2	28	33	19	2	10	1	0	0	3	3	13	7	6	9	7	0	19	13	12	18	8	22	6	14	25	8	14	16	2	2	9	23	18	15	15	21	17	16	6	1	17	5	1	12
3400	4	0	4	8	8	29	32	18	5	5	2	1	0	0	0	21	8	3	8	14	4	24	11	8	30	8	28	11	16	16	15	8	13	8	3	19	34	38	17	18	18	13	15	7	3	15	3	1	10
3450	4	0	5	6	8	23	29	15	3	6	0	1	0	0	3	24	13	4	3	20	0	19	6	8	21	9	23	6	12	11	7	14	21	3	1	12	27	36	11	5	19	12	10	8	1	17	7	6	14
3500	2	0	4	9	5	15	20	7	1	6	0	0	2	3	0	18	15	6	9	16	0	12	8	9	21	7	21	9	10	28	13	8	13	7	1	9	20	27	13	5	22	8	10	1	1	21	4	1	8
3550	4	0	4	9	3	20	18	5	3	7	1	0	0	0	1	17	9	8	10	6	0	17	21	8	15	11	26	3	17	21	23	7	12	8	3	13	27	18	19	7	21	9	15	5	5	24	1	0	6
3600	2	0	5	9	7	19	25	4	2	11	0	0	2	2	1	17	5	6	8	7	0	19	12	11	18	11	22	6	12	22	14	7	11	6	2	13	20	14	11	7	11	12	16	7	3	17	1	1	5
3650	3	0	6	9	5	25	26	5	2	9	2	1	0	1	0	17	7	8	5	12	0	22	15	6	13	9	21	7	9	26	25	12	11	4	1	17	19	20	14	14	16	14	15	9	8	15	3	3	2
3700	1	0	4	4	2	29	17	3	6	7	0	0	0	2	3	10	8	3	4	10	0	22	20	7	20	7	18	10	13	26	25	7	17	7	0	11	22	24	16	16	9	13	13	6	5	17	3	2	9
3750	4	0	2	8	5	25	17	5	2	10	0	0	1	0	0	20	6	5	9	7	0	18	16	7	14	7	18	4	12	30	30	5	19	11	2	11	17	24	12	13	18	10	11	6	6	18	4	0	9
3800	1	0	2	3	3	27	17	7	6	5	0	0	1	0	1	12	8	7	9	3	5	17	16	11	14	9	20	9	7	29	23	12	14	5	2	9	21	22	18	16	40	7	11	4	4	20	0	2	8
3850	1	1	3	10	7	35	24	6	4	2	0	0	1	2	1	15	4	7	8	0	4	17	18	10	14	3	27	8	11	22	20	10	18	5	1	10	17	27	14	17	24	11	13	5	5	21	3	1	7
3900	1	0	2	8	5	32	18	5	1	5	4	2	0	2	2	13	9	7	8	1	12	17	18	8	24	5	13	6	14	21	21	14	11	8	0	15	20	23	19	17	20	12	15	8	3	19	2	1	5
3950	2	0	3	10	2	31	22	5	3	10	0	0	0	0	0	15	7	7	8	12	0	16	12	9	14	7	17	5	6	20	14	8	13	4	3	13	25	16	10	14	24	7	16	7	5	16	3	1	11
4000	3	0	2	5	3	31	21	4	0	5	1	0	3	1	0	18	6	5	10	8	3	14	12	9	14	3	19	4	15	21	20	5	15	3	0	14	21	10	18	17	25	11	12	5	4	17	1	0	10
4050	2	0	1	11	2	22	21	3	0	10	0	0	0	1	1	14	8	7	6	12	0	13	11	10	18	8	16	4	11	18	22	11	17	4	1	13	20	24	9	7	23	11	6	4	3	15	3	0	3
4100	2	1	3	7	1	20	16	7	2	9	0	0	1	0	3	19	6	8	9	8	0	17	16	6	12	8	22	5	11	24	20	5	14	5	4	9	23	18	15	10	29	9	7	3	3	16	3	1	5
4150	1	0	3	5	2	18	21	3	1	4	0	1	2	0	1	16	5	6	4	4	8	20	10	12	13	11	23	6	14	15	18	12	12	6	1	8	18	27	14	12	23	7	8	7	3	16	2	1	9
4200	5	0	2	8	5	22	20	5	3	6	1	5	4	1	1	19	5	6	2	0	0	18	14	14	12	10	13	5	15	19	16	7	16	5	0	8	20	30	12	13	21	11	11	8	2	17	3	1	7
4250	2	0	1	10	1	28	24	7	1	9	0	6	2	0	0	10	5	4	3	0	0	17	15	11	17	8	18	3	16	22	12	8	16	4	1	9	21	23	8	18	21	13	12	13	1	17	3	0	12
4300	3	0	2	12	3	18	23	4	4	6	1	3	0	2	2	19	10	4	4	2	0	16	19	10	16	7	14	7	14	18	15	9	16	8	1	15	18	25	8	11	26	10	11	8	5	17	0	0	7
4350	3	0	3	9	5	24	18	7	2	7	0	10	1	0	5	20	6	4	7	9	0	12	10	9	20	9	20	8	11	20	19	9	14	8	1	16	20	20	14	13	18	6	7	10	6	16	0	0	9
4400	2	0	2	11	2	23	19	9	3	10	0	4	1	2	1	13	8	5	5	13	4	14	15	5	8	8	15	4	16	18	16	9	14	4	2	12	15	24	16	15	19	13	10	5	4	19	2	1	9
4450	1	0	4	6	1	32	20	8	4	9	1	5	2	1	2	19	6	7	2	6	0	15	12	9	14	7	21	8	11	14	20	8	12	2	1	10	23	27	9	13	22	11	9	8	4	17	4	0	12
4500	4	0	3	5	2	23	24	4	0	3	0	3	1	1	3	17	9	5	2	12	0	14	14	8	15	7	23	13	11	20	19	8	13	3	3	11	10	27	12	15	24	7	9	8	4	17	3	1	7
4550	2	0	3	12	5	19	19	6	3	8	0	5	1	0	4	14	8	5	1	8	0	15	8	6	13	9	24	5	11	12	19	10	17	5	2	8	20	20	13	16	19	8	10	3	6	17	5	0	5
4600	2	0	4	11	4	20	18	12	4	7	5	4	2	2	1	21	3	8	6	7	0	21	9	11	13	8	18	9	11	20	16	10	8	7	2	10	16	16	16	8	22	4	9	9	6	16	2	2	3
4650	2	0	4	4	5	16	25	6	4	11	2	6	2	1	2	22	4	6	2	10	0	18	9	10	15	5	18	5	11	21	19	15	14	5	3	13	17	18	15	14	19	13	9	3	2	16	3	0	11
4700	1	0	1	5	2	16	18	7	2	5	0	3	0	0	2	15	8	6	4	11	0	12	13	12	11	9	14	4	13	20	15	16	12	3	5	6	16	16	12	10	18	10	11	7	6	20	2	0	8
4750	3	0	2	5	0	19	23	5	3	6	0	4	0	3	1	13	4	6	2	10	0	15	17	5	15	7	15	9	13	20	19	18	12	3	3	11	19	26	11	16	18	11	17	3	3	15	1	0	8
4800	2	0	1	9	4	16	20	9	3	5	0	6	0	1	2	13	9	9	3	8	4	15	10	13	14	7	21	8	10	20	16	11	16	2	4	7	19	23	8	13	26	10	10	4	5	17	2	1	7
4850	2	1	1	5	0	21	21	4	0	6	0	2	1	1	1	12	5	8	7	11	2	14	8	8	14	7	18	5	12	18	15	12	13	7	3	8	21	17	12	9	16	8	12	2	5	19	3	0	5
4900	1	0	1	7	0	22	16	9	1	8	1	4	0	7	1	19	4	8	8	0	0	17	9	9	16	6	16	6	15	20	17	10	19	2	10	13	13	25	16	13	19	10	8	6	8	17	1	0	12
4950	1	0	2	3	2	22	24	3	1	9	0	4	1	4	2	22	7	6	6	0	0	15	15	10	14	8	18	4	12	14	15	7	15	3	4	11	19	19	16	14	22	7	16	6	4	17	3	1	4
5000	2	0	5	9	4	25	20	10	0	3	0	7	0	2	0	17	5	5	9	0	0	16	11	15	19	10	20	5	16	15	15	6	14	3	4	10	14	18	15	14	18	12	12	5	7	17	4	0	7
5050	0	0	3	7	3	16	31	9	2	10	0	3	2	6	2	23	8	4	10	3	0	17	8	10	16	9	21	6	13	19	17	10	15	5	4	10	20	17	11	11	20	11	13	5	2	16	3	1	7
5100	1	0	2	5	1	16	33	6	1	9	0	2	1	1	0	17	5	6	5	0	0	18	11	10	15	9	16	2	10	20	18	10	13	1	2	12	18	15	16	9	21	14	7	4	0	18	3	0	9
5150	5	1	8	6	5	17	24	6	3	3	0	4	1	1	1	16	7	8	7	0	0	18	11	8	15	5	22	5	13	18	17	9	13	6	3	12	20	25	13	11	18	13	10	5	1	22	6	1	4
5200	0	1	1	8	4	25	18	5	2	6	0	4	1	1	2	18	4	7	8	9	0	15	16	12	15	5	21	5	12	18	16	11	16	9	3	14	19	15	8	12	20	7	8	6	5	19	1	1	8
5250	4	1	5	10	2	14	19	9	2	3	1	6	0	1	0	17	4	6	7	9	0	16	15	9	14	5	18	3	14	19	17	11	15	3	1	9	18	23	14	10	19	7	11	9	3	18	6	3	8
5300	1	0	3	6	7	22	22	3	0	7	0	4	1	2	2	18	5	8	8	4	0	18	13	10	13	4	24	7	10	15	16	11	14	1	4	10	19	14	10	17	17	8	12	7	1	18	4	3	9
5350	3	0	0	7	3	16	19	14	2	2	0	1	2	3	2	18	5	5	11	0	0	16	6	16	13	6	20	4	12	18	19	9	19	4	2	16	16	20	24	9	19	11	16	4	8	18	6	0	7
5400	2	0	6	9	1	18	23	8	4	5	0	5	0	0	3	18	8	5	2	0	3	19	14	13	15	11	15	10	8	19	21	8	15	6	1	13	16	15	21	17	19	8	13	7	4	19	3	2	8
5450	2	0	2	11	2	16	24	9	3	2	1	2	3	1	2	22	5	5	7	8	0	21	15	9	15	6	19	6	10	14	15	15	12	5	3	10	16	19	19	16	19	7	15	3	10	17	4	2	7
5500	2	1	3	8	2	20	21	12	1	5	0	5	0	1	1	29	4	8	8	6	0	16	9	9	18	11	19	6	14	23	20	10	16	5	3	18	17	19	13	14	18	17	9	5	5	17	3	0	7
5550	1	1	2	7	4	22	24	12	2	8	0	3	0	0	1	24	7	3	8	0	0	13	16	9	19	11	17	9	14	24	22	12	15	6	3	6	21	20	21	18	18	12	10	7	3	18	4	2	8
5600	4	0	4	6	4	24	22	11	5	7	4	4	1	4	1	23	10	10	11	0	0	11	10	8	19	11	19	8	13	21	20	11	11	7	0	9	20	13	14	12	21	3	11	4	4	22	4	1	8
5650	2	1	6	10	3	33	18	3	3	6	0	6	0	2	0	16	5	6	8	9	0	12	11	18	18	10	19	6	14	15	16	11	10	8	2	14	13	17	20	12	26	12	13	6	5	19	3	1	4
5700	2	0	1	6	3	23	29	6	4	5	0	3	1	0	0	25	7	3	9	8	0	8	14	12	18	3	18	7	17	16	15	9	18	7	0	9	20	19	19	12	23	9	11	9	3	18	4	4	8
5750	0	0	1	8	3	19	26	9	1	7	0	3	1	2	0	27	6	2	5	9	4	15	13	9	18	10	20	5	12	17	13	10	13	3	3	11	21	20	11	10	22	8	14	5	8	14	2	3	7
5800	0	0	3	4	5	24	19	10	0	5	0	2	0	1	3	17	12	5	7	7	4	10	7	12	14	7	23	5	6	15	19	10	22	8	4	10	24	20	12	14	23	10	7	7	4	20	1	0	4
5850	4	0	5	6	5	18	23	9	3	6	1	11	0	1	3	21	5	5	4	7	0	17	12	14	13	3	22	8	13	19	19	12	16	8	2	12	19	21	10	9	22	8	14	6	5	22	3	1	14
5900	0	0	6	5	5	19	17	6	5	6	1	6	1	0	2	20	9	2	10	5	0	19	8	9	13	7	18	6	14	18	21	8	15	3	1	10	16	15	23	8	18	5	14	6	5	19	3	0	1
5950	2	0	6	6	3	24	19	8	1	5	0	7	0	1	0	12	7	2	6	3	4	13	16	10	13	8	15	7	16	23	19	13	14	1	5	12	16	16	16	7	17	4	16	10	3	16	2	3	11
6000	3	0	1	6	4	25	33	7	5	5	0	8	3	2	1	19	8	8	5	8	11	13	12	8	18	10	19	6	14	26	19	17	18	11	3	11	17	21	17	12	18	2	14	12	2	21	6	0	11
6050	3	0	6	8	1	28	32	10	1	6	0	10	0	0	4	25	6	6	7	10	5	10	11	8	20	8	13	5	15	21	18	14	22	6	2	18	17	16	12	14	19	2	10	8	2	17	4	3	11
6100	2	1	2	8	1	28	22	5	3	6	0	5	0	0	1	13	8	1	9	8	4	12	15	12	22	10	17	7	15	18	19	14	14	7	1	14	21	25	21	14	20	3	10	8	2	25	3	1	10
6150	2	1	3	9	3	18	20	9	1	3	0	0	0	1	1	16	9	3	11	8	3	12	12	8	13	14	22	5	22	22	22	6	11	8	5	11	31	16	16	13	23	0	12	6	1	21	5	2	10
6200	0	1	2	7	4	18	27	5	2	9	0	1	2	1	2	15	9	0	12	12	0	14	11	7	17	10	24	10	13	16	18	14	15	9	6	13	23	19	10	16	22	0	9	8	5	21	2	3	6
6250	4	0	5	6	2	23	27	10	4	3	0	3	0	3	4	23	6	3	10	4	0	13	12	10	19	7	18	3	9	20	17	17	12	3	5	14	14	29	11	12	24	15	8	7	5	16	2	0	10
6300	2	0	2	8	2	20	20	7	8	3	0	4	1	3	2	16	9	3	8	0	2	20	12	12	13	10	20	5	17	17	15	13	11	9	4	14	17	19	10	14	19	12	20	3	4	16	5	4	14
6350	0	0	5	7	3	17	22	7	0	7	0	1	1	1	1	19	11	3	8	1	6	15	11	9	21	8	22	4	12	21	16	8	12	8	4	13	23	20	17	16	26	9	26	5	6	19	4	2	10
6400	2	0	6	8	1	21	20	4	5	9	0	2	0	1	3	17	12	3	5	8	0	21	10	9	11	7	24	6	12	22	18	9	15	6	2	13	19	19	10	6	18	10	15	6	10	20	1	2	10
6450	4	0	0	3	1	20	19	11	1	5	0	3	2	1	0	20	7	8	8	9	0	20	19	13	18	8	20	8	15	29	21	5	12	9	2	16	18	18	19	10	19	11	15	6	3	23	3	2	9
6500	1	0	4	10	3	23	23	7	4	3	0	1	0	1	2	16	8	3	10	6	0	22	14	10	16	6	23	8	17	18	18	10	12	7	1	13	20	21	13	12	22	8	14	4	4	19	3	0	9
6550	4	0	2	8	2	26	17	8	0	6	0	1	1	0	0	19	10	1	13	9	4	14	10	7	15	7	19	7	7	22	15	14	15	9	3	19	18	20	9	21	16	11	14	7	4	15	3	2	4
6600	6	1	2	7	3	41	16	11	1	5	0	3	2	1	1	19	3	5	10	9	6	16	16	14	16	9	20	8	11	30	22	9	16	8	1	11	21	20	12	15	24	14	11	9	5	19	4	1	6
6650	4	0	1	9	3	22	20	10	3	6	2	3	0	1	1	14	7	3	5	10	0	16	20	13	15	12	29	6	13	22	18	10	14	7	4	15	18	22	12	12	19	9	12	7	5	21	4	1	9
6700	4	0	3	5	3	23	15	1	5	6	0	0	1	0	3	15	7	2	6	8	2	22	15	9	17	7	20	6	12	16	23	3	13	7	6	11	19	17	20	15	25	6	8	1	7	21	2	1	8
6750	0	0	2	10	3	23	20	8	3	7	0	1	0	0	0	17	6	3	8	5	0	16	11	6	13	8	15	11	15	22	20	8	15	7	2	11	16	23	16	15	26	6	10	8	6	21	3	0	12
6800	2	1	3	7	4	23	20	7	2	4	0	3	0	0	0	16	5	5	4	0	0	18	10	9	11	11	19	9	14	24	17	10	10	7	1	13	14	18	11	13	20	9	13	8	4	23	2	1	11
6850	2	0	1	8	6	23	27	6	1	10	0	1	0	1	1	17	5	4	4	0	1	22	11	12	20	15	18	5	12	21	17	3	9	7	3	8	15	18	16	10	17	7	12	6	7	25	4	0	12
6900	3	0	6	5	2	23	20	3	0	6	1	0	0	1	2	14	4	4	7	0	1	16	13	16	20	8	19	4	11	18	20	5	15	6	4	11	17	18	11	11	29	6	14	6	1	22	2	2	6
6950	2	0	3	5	8	18	22	5	3	6	0	2	1	3	1	18	8	5	2	0	0	17	14	7	18	10	14	7	15	24	18	12	13	10	4	10	19	15	10	11	24	13	12	5	4	19	4	3	13
7000	3	0	4	6	0	19	21	5	4	4	0	2	0	1	2	15	6	1	8	0	0	13	7	13	18	4	28	6	17	16	15	9	12	8	1	9	14	21	18	14	18	9	9	6	7	21	6	1	12
7050	7	0	3	9	3	17	23	5	3	4	1	2	1	3	1	21	12	1	10	6	0	16	10	10	22	7	14	6	18	19	18	12	16	4	2	14	12	22	18	9	23	13	14	3	6	23	3	2	14
7100	3	0	4	10	5	15	19	7	1	7	1	1	2	2	2	17	9	2	8	13	0	12	10	9	18	8	24	9	16	17	16	14	20	7	2	13	18	34	10	15	19	16	9	10	6	17	4	4	7
7150	0	0	5	7	3	19	26	8	1	8	0	2	1	3	2	18	7	4	4	11	0	15	16	14	20	11	18	9	9	19	12	8	14	5	5	9	18	19	19	13	23	9	14	2	5	27	3	1	10
7200	6	0	3	6	2	16	18	6	0	2	0	1	0	0	1	17	7	1	11	11	0	18	11	6	20	10	21	4	15	19	19	11	11	9	1	13	14	17	17	9	21	13	8	4	6	27	6	1	8
7250	4	1	5	7	3	13	19	6	3	11	0	3	2	1	3	15	10	3	7	11	2	22	14	6	13	12	18	5	15	20	17	10	17	9	1	13	20	23	14	11	19	6	14	9	1	22	1	1	8
7300	1	0	5	10	2	19	28	5	1	4	1	4	2	2	1	17	7	1	16	0	0	22	16	11	18	10	23	8	12	18	19	5	15	8	2	17	19	30	13	7	16	17	15	5	5	24	4	1	11
7350	2	0	2	6	3	23	20	12	4	5	0	1	1	10	2	13	13	1	6	0	0	22	14	12	14	8	19	8	14	21	11	12	9	8	3	12	15	19	20	15	20	8	14	6	6	19	3	2	7
7400	3	0	4	9	3	20	15	4	2	6	0	1	0	3	2	15	8	3	11	5	0	17	18	9	15	5	23	7	13	19	16	13	14	10	3	13	23	23	13	11	19	8	12	4	5	19	4	0	9
7450	2	1	6	13	3	18	26	10	3	4	0	4	0	0	1	19	3	6	10	6	0	15	12	10	20	5	24	7	12	18	18	5	19	7	2	4	22	16	16	8	21	10	10	5	5	18	2	0	10
7500	0	0	3	8	3	19	25	5	2	6	0	1	0	2	3	20	11	3	8	6	0	18	12	8	20	8	25	7	11	20	17	14	14	6	2	11	17	19	12	7	24	14	15	7	6	18	3	0	10
7550	7	0	2	10	4	24	22	9	3	8	1	1	1	2	3	18	7	2	10	6	0	18	16	9	11	7	16	10	11	20	13	9	10	7	4	7	17	19	14	10	24	12	11	5	1	16	2	2	7
7600	4	0	3	9	5	21	15	5	0	6	0	1	2	3	3	14	8	1	5	5	0	18	15	10	11	9	18	2	10	16	21	10	10	6	2	11	18	23	16	14	17	8	9	5	7	22	1	1	7
7650	2	0	3	7	3	15	20	5	3	6	0	4	2	0	2	13	5	0	4	10	0	17	13	5	16	9	19	6	12	24	15	15	14	5	2	14	21	18	10	13	24	7	9	5	3	20	3	2	6
7700	2	0	3	9	5	22	28	6	2	4	0	9	1	0	2	19	8	3	10	0	0	12	9	10	14	4	18	6	17	21	16	9	12	8	3	10	16	19	16	17	25	6	14	5	5	19	2	0	6
7750	2	0	5	8	5	20	16	7	3	5	0	12	3	1	1	17	5	3	13	0	0	17	13	9	17	4	18	12	10	21	21	8	13	0	3	14	16	19	12	11	17	14	17	4	3	18	4	1	10
7800	1	1	4	6	2	24	20	6	2	6	0	7	0	3	3	11	9	3	7	0	0	16	11	9	15	11	17	10	10	21	22	9	18	4	3	13	14	21	10	17	26	8	9	4	5	15	4	0	11
7850	1	0	2	5	4	15	16	6	0	8	1	5	1	3	0	22	4	3	10	0	0	12	18	16	14	8	19	13	14	22	16	8	17	3	2	14	18	19	11	11	21	9	14	5	6	17	2	1	11
7900	1	0	3	7	3	21	18	2	3	8	0	8	1	1	2	14	9	5	7	0	0	17	14	14	17	7	20	8	16	19	25	10	18	4	4	13	21	24	17	9	23	11	14	6	3	24	3	0	9
7950	1	0	3	7	3	22	18	6	5	7	1	11	0	0	2	12	11	7	10	0	0	17	9	6	10	9	18	12	8	15	16	7	14	7	3	9	18	15	19	9	26	8	13	3	7	24	2	2	11
8000	2	0	3	5	3	20	30	8	5	5	1	3	2	0	0	22	4	0	12	0	0	18	13	11	16	2	16	19	10	16	14	8	15	5	4	13	15	22	17	8	26	17	12	9	5	20	1	1	9
8050	1	0	6	10	3	19	29	5	7	10	1	7	0	0	1	24	5	4	17	2	0	14	8	11	18	9	14	11	13	12	17	7	15	6	2	9	16	17	21	8	17	7	10	10	6	17	4	1	9
8100	1	0	6	9	1	18	30	11	1	3	0	7	2	0	1	22	11	1	5	10	0	16	8	8	20	9	13	11	14	20	17	8	18	7	3	16	15	24	12	8	24	7	16	6	4	22	6	2	11
8150	0	0	4	5	5	16	34	7	3	5	0	10	1	1	1	24	9	2	12	9	0	15	9	10	18	8	24	13	16	18	15	11	13	5	1	11	22	17	12	8	22	6	14	5	8	11	3	1	9
8200	2	0	2	8	3	16	30	7	3	7	0	8	0	1	1	19	11	2	4	8	0	15	15	11	17	4	24	19	9	21	17	5	16	6	5	6	19	26	15	7	28	9	6	6	1	14	8	0	15
8250	6	0	6	8	1	18	30	6	1	7	0	6	1	2	1	16	6	3	11	1	0	13	10	9	19	5	23	14	12	16	14	2	17	2	4	10	18	17	10	15	21	10	9	9	8	16	3	0	10
8300	4	0	5	8	1	16	26	3	4	13	0	10	2	1	3	9	7	1	7	0	0	15	11	5	12	14	26	5	10	17	11	9	14	2	3	7	20	20	14	14	13	10	13	6	4	19	6	1	13
8350	3	0	1	7	4	15	32	3	4	6	4	13	0	3	2	18	8	5	8	0	9	19	10	12	11	8	24	7	13	14	15	5	20	3	3	9	17	26	17	7	17	10	6	4	0	18	5	2	5
8400	5	0	2	9	2	15	27	5	4	8	0	13	3	1	2	17	6	7	6	7	12	26	12	10	19	6	15	3	14	22	16	6	15	5	2	9	14	21	19	10	19	9	15	7	5	18	4	0	10
8450	5	0	4	7	5	17	35	9	0	10	0	23	4	1	0	21	6	7	15	7	10	18	19	8	12	10	17	12	16	21	19	9	15	5	1	17	15	13	18	7	19	13	16	10	2	13	4	1	11
8500	1	0	4	7	2	13	33	8	2	6	0	25	4	2	0	24	6	5	7	11	14	17	14	11	22	15	18	25	20	25	21	15	6	6	3	12	15	26	12	6	17	17	8	8	4	14	6	0	14
8550	4	1	2	10	4	17	36	10	2	4	0	12	5	1	3	33	8	6	7	13	12	17	14	9	22	7	16	19	23	20	18	21	18	6	2	13	14	17	12	17	21	14	9	13	3	20	6	2	5
8600	5	1	2	9	1	21	35	12	2	3	0	10	3	0	4	21	8	7	14	11	14	12	10	6	20	13	20	9	18	18	22	13	14	8	1	15	25	17	17	21	17	9	10	11	1	14	5	2	7
8650	0	0	5	13	3	26	35	9	2	1	0	13	1	1	4	33	4	6	10	2	9	21	12	4	25	6	27	6	4	16	17	20	14	4	3	20	21	16	15	9	25	15	11	9	3	20	7	3	12
8700	0	2	3	9	4	25	29	6	2	2	0	6	2	1	2	18	11	6	9	0	10	16	7	4	15	5	22	9	23	18	19	15	12	10	1	8	20	13	15	15	22	13	11	8	4	16	5	0	6
8750	2	1	6	10	4	17	26	6	3	5	0	10	0	2	3	18	4	6	8	5	9	22	9	8	14	4	19	5	25	20	14	12	10	7	2	12	35	16	9	14	20	12	11	11	6	16	2	0	7
8800	0	0	3	5	4	17	31	5	2	3	0	3	0	1	1	17	3	9	8	11	15	25	8	4	16	3	38	5	14	18	15	17	9	7	4	7	20	18	11	6	23	8	12	5	3	8	4	1	7
8850	0	0	2	10	7	15	24	7	2	3	0	2	2	0	5	12	8	5	8	9	16	25	5	5	12	6	27	4	16	25	21	12	10	5	2	11	23	22	9	11	17	5	16	6	1	14	3	2	10
8900	1	0	4	3	2	19	26	6	3	5	0	2	0	1	4	11	6	6	9	0	14	21	18	5	13	8	30	7	10	28	16	12	8	4	1	10	25	23	4	9	19	13	16	6	6	13	2	0	8
8950	0	0	4	3	6	21	20	1	3	0	0	3	1	2	0	13	5	4	6	0	15	29	12	1	6	3	19	7	11	32	20	8	3	7	1	6	19	16	2	8	15	6	11	5	7	8	2	0	9
9000	2	0	4	2	3	25	16	5	4	0	0	3	0	0	1	11	7	6	9	0	10	29	30	3	8	5	22	3	16	32	26	6	12	7	0	9	20	13	7	12	23	7	14	5	8	12	4	1	7
9050	1	1	2	3	6	25	12	4	0	1	2	4	1	1	1	11	5	5	9	0	12	31	14	4	11	1	17	1	12	40	27	4	5	3	6	1	14	24	6	15	22	6	9	4	5	6	0	0	5
9100	0	0	5	2	2	25	14	0	1	6	0	5	0	1	0	17	10	9	5	0	10	17	24	5	9	7	15	3	8	15	29	7	8	7	0	3	12	24	3	20	25	3	10	3	3	6	0	0	6
9150	0	0	2	6	3	33	15	2	1	5	1	4	1	1	1	9	3	6	5	0	10	14	19	2	7	2	16	0	1	26	24	7	6	6	3	5	9	24	9	12	26	10	12	6	2	15	1	0	6
9200	2	0	4	6	4	38	17	2	2	4	0	7	0	1	2	2	2	3	5	0	8	13	13	2	10	1	9	4	8	25	12	7	6	4	4	2	5	17	13	12	32	7	9	3	2	3	0	1	12
9250	0	0	1	5	2	24	16	1	0	3	0	12	1	0	3	10	5	7	2	0	9	9	11	3	12	4	11	4	4	25	7	6	11	1	2	6	12	17	10	13	39	8	8	7	0	7	1	0	4
9300	2	0	2	5	0	21	7	5	1	1	1	3	0	2	2	13	6	2	2	0	11	11	17	3	9	2	6	3	5	23	14	5	10	7	1	5	11	21	7	4	24	1	6	2	2	11	2	1	2
9350	0	0	1	5	2	19	8	2	2	7	0	1	0	7	0	7	1	4	2	0	8	9	7	0	8	4	3	3	15	14	12	2	5	4	2	3	17	16	9	12	23	6	5	5	2	8	1	1	2
9400	2	0	1	4	0	11	14	3	0	5	1	1	1	1	0	13	4	4	4	0	9	6	3	3	17	4	12	7	10	16	13	4	5	3	1	3	12	19	12	17	31	5	3	0	5	6	2	1	4
9450	1	0	2	14	1	7	12	1	0	0	0	3	0	1	0	18	2	2	0	0	1	10	10	3	8	5	12	3	5	18	8	0	9	3	3	23	11	19	13	12	21	8	1	1	2	8	3	1	11
9500	0	0	2	9	2	12	9	1	5	0	0	0	0	4	1	10	4	0	13	0	2	7	10	0	14	2	14	0	7	18	6	5	5	3	0	27	13	20	0	7	21	2	3	0	3	8	8	1	6
9550	0	0	4	14	2	15	14	0	1	0	0	0	0	1	0	17	4	0	4	0	5	13	8	0	15	0	9	4	14	12	4	7	0	2	0	11	14	31	0	3	20	0	5	4	1	6	3	2	10
9600	0	0	4	0	1	15	0	0	0	0	0	0	0	0	0	9	1	0	7	0	3	13	5	0	9	0	13	6	10	8	5	7	0	3	1	2	20	29	0	3	20	3	3	6	1	2	5	0	8
9650	0	0	6	1	3	10	0	0	7	0	1	0	0	0	1	14	0	0	0	0	2	12	9	0	9	0	6	0	6	13	11	0	0	3	0	0	26	20	0	6	19	9	2	1	2	0	0	3	11
9700	0	0	0	10	1	17	0	0	2	0	0	0	0	0	0	19	0	0	0	0	5	8	6	0	0	0	18	0	12	11	9	0	0	2	0	0	18	20	0	3	15	0	3	2	1	0	1	0	9
9750	0	0	0	9	3	11	0	0	0	0	0	0	0	0	1	3	0	0	0	0	4	12	7	0	0	0	15	0	6	9	7	0	0	0	0	0	0	20	0	2	13	0	4	0	4	0	0	0	6
9800	0	0	0	5	0	12	0	0	0	0	0	0	0	0	2	0	0	0	0	0	3	20	11	0	0	0	9	0	11	8	7	0	0	0	0	0	0	22	0	2	25	0	1	0	2	0	0	0	9
9850	0	0	0	3	5	10	0	0	0	0	0	0	0	0	0	0	0	0	0	0	6	25	13	0	0	0	0	0	8	14	11	0	0	0	0	0	0	24	0	13	15	0	4	0	1	0	0	0	11
9900	0	0	0	0	0	12	0	0	0	0	0	0	0	0	1	0	0	0	0	0	1	17	12	0	0	0	0	0	8	5	7	0	0	0	0	0	0	18	0	10	5	0	2	0	0	0	0	0	0
9950	0	0	0	0	0	19	0	0	0	0	0	0	0	0	0	0	0	0	0	0	0	22	8	0	0	0	0	0	0	16	1	0	0	0	0	0	0	15	0	4	15	0	0	0	0	0	0	0	0
10000	0	0	0	0	0	16	0	0	0	0	0	0	0	0	0	0	0	0	0	0	0	18	10	0	0	0	0	0	0	16	8	0	0	0	0	0	0	14	0	3	13	0	0	0	0	0	0	0	0
10050	0	0	0	0	0	20	0	0	0	0	0	0	0	0	0	0	0	0	0	0	0	10	6	0	0	0	0	0	0	23	3	0	0	0	0	0	0	14	0	6	15	0	0	0	0	0	0	0	0
10100	0	0	0	0	0	16	0	0	0	0	0	0	0	0	0	0	0	0	0	0	0	0	8	0	0	0	0	0	0	15	0	0	0	0	0	0	0	11	0	3	25	0	0	0	0	0	0	0	0
10150	0	0	0	0	0	15	0	0	0	0	0	0	0	0	0	0	0	0	0	0	0	0	0	0	0	0	0	0	0	7	0	0	0	0	0	0	0	9	0	2	7	0	0	0	0	0	0	0	0
10200	0	0	0	0	0	26	0	0	0	0	0	0	0	0	0	0	0	0	0	0	0	0	0	0	0	0	0	0	0	19	0	0	0	0	0	0	0	15	0	0	23	0	0	0	0	0	0	0	0
10250	0	0	0	0	0	0	0	0	0	0	0	0	0	0	0	0	0	0	0	0	0	0	0	0	0	0	0	0	0	4	0	0	0	0	0	0	0	9	0	0	28	0	0	0	0	0	0	0	0
10300	0	0	0	0	0	0	0	0	0	0	0	0	0	0	0	0	0	0	0	0	0	0	0	0	0	0	0	0	0	14	0	0	0	0	0	0	0	8	0	0	24	0	0	0	0	0	0	0	0
10350	0	0	0	0	0	0	0	0	0	0	0	0	0	0	0	0	0	0	0	0	0	0	0	0	0	0	0	0	0	11	0	0	0	0	0	0	0	16	0	0	25	0	0	0	0	0	0	0	0
10400	0	0	0	0	0	0	0	0	0	0	0	0	0	0	0	0	0	0	0	0	0	0	0	0	0	0	0	0	0	1	0	0	0	0	0	0	0	18	0	0	17	0	0	0	0	0	0	0	0
10450	0	0	0	0	0	0	0	0	0	0	0	0	0	0	0	0	0	0	0	0	0	0	0	0	0	0	0	0	0	0	0	0	0	0	0	0	0	13	0	0	0	0	0	0	0	0	0	0	0
10500	0	0	0	0	0	0	0	0	0	0	0	0	0	0	0	0	0	0	0	0	0	0	0	0	0	0	0	0	0	0	0	0	0	0	0	0	0	8	0	0	0	0	0	0	0	0	0	0	0
10550	0	0	0	0	0	0	0	0	0	0	0	0	0	0	0	0	0	0	0	0	0	0	0	0	0	0	0	0	0	0	0	0	0	0	0	0	0	11	0	0	0	0	0	0	0	0	0	0	0
10600	0	0	0	0	0	0	0	0	0	0	0	0	0	0	0	0	0	0	0	0	0	0	0	0	0	0	0	0	0	0	0	0	0	0	0	0	0	15	0	0	0	0	0	0	0	0	0	0	0
10650	0	0	0	0	0	0	0	0	0	0	0	0	0	0	0	0	0	0	0	0	0	0	0	0	0	0	0	0	0	0	0	0	0	0	0	0	0	0	0	0	0	0	0	0	0	0	0	0	0
10700	0	0	0	0	0	0	0	0	0	0	0	0	0	0	0	0	0	0	0	0	0	0	0	0	0	0	0	0	0	0	0	0	0	0	0	0	0	0	0	0	0	0	0	0	0	0	0	0	0
10750	0	0	0	0	0	0	0	0	0	0	0	0	0	0	0	0	0	0	0	0	0	0	0	0	0	0	0	0	0	0	0	0	0	0	0	0	0	0	0	0	0	0	0	0	0	0	0	0	0
10800	0	0	0	0	0	0	0	0	0	0	0	0	0	0	0	0	0	0	0	0	0	0	0	0	0	0	0	0	0	0	0	0	0	0	0	0	0	0	0	0	0	0	0	0	0	0	0	0	0
10850	0	0	0	0	0	0	0	0	0	0	0	0	0	0	0	0	0	0	0	0	0	0	0	0	0	0	0	0	0	0	0	0	0	0	0	0	0	0	0	0	0	0	0	0	0	0	0	0	0
10900	0	0	0	0	0	0	0	0	0	0	0	0	0	0	0	0	0	0	0	0	0	0	0	0	0	0	0	0	0	0	0	0	0	0	0	0	0	0	0	0	0	0	0	0	0	0	0	0	0
10950	0	0	0	0	0	0	0	0	0	0	0	0	0	0	0	0	0	0	0	0	0	0	0	0	0	0	0	0	0	0	0	0	0	0	0	0	0	0	0	0	0	0	0	0	0	0	0	0	0
11000	0	0	0	0	0	0	0	0	0	0	0	0	0	0	0	0	0	0	0	0	0	0	0	0	0	0	0	0	0	0	0	0	0	0	0	0	0	0	0	0	0	0	0	0	0	0	0	0	0
	Agropyron Mosaic Virus (AMV)	Asparagus virus 1	Banana Bract Mosaic Virus (BBMV)	Basella Rugose Mosaic Virus (BRMV)	Bean Common Mosaic Necrosis Virus (BCMNV)	Bean common mosaic virus (BCMV)	Bean Yellow Mosaic Virus (BYMV)	Beet mosaic virus (BMV)	Bidens mottle virus	Blue squill virus A	Calla lily latent virus	Canna yellow streak virus	Carrot thin leaf virus	Catharanthus mosaic virus	Celery mosaic virus	Chiili Veinal Mottel Virus (CVMV)	Chilli ringspot virus	Clover Yellow Vein Virus (CYVV)	Cocksfoot Streak Virus (CSV)	Cucurbit vein banding virus	Cyrtanthus elatus virus A	Dasheen Mosaic Virus (DasMV)	East Asian Passiflora Virus (EAPV)	Habenaria mosaic virus	Hardenbergia mosaic virus	Iranian johnsongrass mosaic virus	Japanese yam mosaic virus (JYMV)	Jasmine virus T	Johnsongrass mosaic virus (JGMV)	Leek Yellow Stripe Virus (LYSV)	Lettuce mosaic virus (LMV)	Lily Mottle Virus (LiMV)	Maize dwarf mosaic virus (MDMV)	Moroccan Watermelon Mosaic Virus (MWMV)	Narcissus Degeneration Virus (NDV)	Narcissus late season yellows virus	Narcissus yellow strip virus (NYSV)	Onion yellow dwarf virus (OYDV)	Ornithogalum mosaic virus	Papaya Leaf Distortion Mosaic Virus (PLDMV)	Papaya ringspot virus (PRSV)	Passion fruit woodiness virus	Pea Seed-Borne Mosaic Virus (PSBMV)	Peanut mottle virus (PMV)	Peanut Stripe virus (PSV)	Pennisetum mosaic virus (PeMV)	Pepper mottle virus (PepMV)	Pepper Veinal Mottel Virus (PVMV)	Peru Tomato Mosaic Virus (PTMV)
Total SNP	387	39	674	1762	721	4734	4499	1329	511	1226	100	805	187	267	550	3675	1511	990	1478	1294	470	3663	2981	1791	3228	1440	4125	1389	2622	4452	3760	1939	2679	1131	489	2136	3847	4776	2846	2713	4821	1545	2450	1339	888	3451	666	217	1863
Accessions	2	3	4	4	13	63	48	5	7	3	4	11	3	3	3	14	5	8	3	3	3	7	26	3	9	3	8	4	5	17	32	9	9	5	3	4	5	10	6	7	55	4	5	6	5	23	24	5	3
Length	9842	9741	9713	9882	9893	10086	9548	9591	9741	9842	9731	9502	9491	9636	10000	9741	9652	9585	9663	9969	9942	10038	10169	9499	9682	9544	9760	9660	9874	10341	10080	9648	9554	9730	9816	9687	9654	10552	9447	10155	10349	9689	9939	9734	10086	9613	9717	9812	9899
Variable positions	0.0393213	0.0040037	0.0693915	0.178304	0.0728798	0.469363	0.471198	0.138567	0.0524587	0.124568	0.0102764	0.084719	0.0197029	0.0277086	0.055	0.377271	0.156548	0.103286	0.152955	0.129802	0.0472742	0.364913	0.293146	0.188546	0.333402	0.15088	0.422643	0.143789	0.265546	0.430519	0.373016	0.200974	0.280406	0.116238	0.0498166	0.220502	0.398488	0.452616	0.30126	0.267159	0.465842	0.159459	0.246504	0.137559	0.0880428	0.358993	0.0685397	0.0221158	0.188201
[truncated: 30 more columns]

## Sheet: Sheet4
KM025048.1	Sorghum	mosaic	virus	isolate	YN-LC136,	complete	genome	9585
KM025046.1	Sorghum	mosaic	virus	isolate	GD-ROC222,	complete	genome	9587
U57358.2	Sorghum	mosaic	virus	strain	H,	complete	genome	9613
KM025040.1	Sorghum	mosaic	virus	isolate	HN-YC108,	complete	genome	9621
AJ310197.1	Sorghum	mosaic	virus	genomic	RNA	for	polyprotein	9624
KM025038.1	Sorghum	mosaic	virus	isolate	FJ-GN70,	complete	genome	9624
KM025039.1	Sorghum	mosaic	virus	isolate	YN-YZ151,	complete	genome	9624
KM025041.1	Sorghum	mosaic	virus	isolate	GX-LC1362,	complete	genome	9624
KM025042.1	Sorghum	mosaic	virus	isolate	GZ-GT11,	complete	genome	9624
KM025043.1	Sorghum	mosaic	virus	isolate	FJ-GT53,	complete	genome	9624
KM025044.1	Sorghum	mosaic	virus	isolate	GX-YT861,	complete	genome	9624
KM025045.1	Sorghum	mosaic	virus	isolate	YN-YT168,	complete	genome	9624
KM025049.1	Sorghum	mosaic	virus	isolate	YN-YT1592,	complete	genome	9624
KM025050.1	Sorghum	mosaic	virus	isolate	GX-YZ194,	complete	genome	9624
KJ541740.1	Sorghum	mosaic	virus	isolate	GX,	complete	genome	9626
AJ310198.1	Sorghum	mosaic	virus	genomic	RNA	for	polyprotein	9627
KM025051.1	Sorghum	mosaic	virus	isolate	HN-YZ49,	complete	genome	9627
KM025047.1	Sorghum	mosaic	virus	isolate	GD-YT861,	complete	genome	9629
KM025053.1	Sorghum	mosaic	virus	isolate	GX-YG35,	complete	genome	9641
KM025052.1	Sorghum	mosaic	virus	isolate	FJ-CI20031,	complete	genome	9651
KM025054.1	Sorghum	mosaic	virus	isolate	YN-ROC221,	complete	genome	9652
EF078962.1	Sorghum	mosaic	virus	coat	protein	gene,	partial	cds	871
JX238345.1	Sorghum	mosaic	virus	isolate	ARG-985	coat	protein	gene,	partial	cds	273
JX238338.1	Sorghum	mosaic	virus	isolate	ARG-545	coat	protein	gene,	partial	cds	312
JX238339.1	Sorghum	mosaic	virus	isolate	ARG-546	coat	protein	gene,	partial	cds	312
JX238340.1	Sorghum	mosaic	virus	isolate	ARG-611	coat	protein	gene,	partial	cds	312
JX238341.1	Sorghum	mosaic	virus	isolate	ARG-612	coat	protein	gene,	partial	cds	314
KC179694.1	Sorghum	mosaic	virus	isolate	HN-dz-6	coat	protein	gene,	partial	cds	343
KC179695.1	Sorghum	mosaic	virus	isolate	GX-hc-1	coat	protein	gene,	partial	cds	343
KC179696.1	Sorghum	mosaic	virus	isolate	GX-hc-2	coat	protein	gene,	partial	cds	343
KC179697.1	Sorghum	mosaic	virus	isolate	GX-lb-2	coat	protein	gene,	partial	cds	343
KC179698.1	Sorghum	mosaic	virus	isolate	GX-lb-1-2	coat	protein	gene,	partial	cds	343
KC179699.1	Sorghum	mosaic	virus	isolate	GX-lb-3	coat	protein	gene,	partial	cds	343
KC179700.1	Sorghum	mosaic	virus	isolate	YN-ky-6	coat	protein	gene,	partial	cds	343
JX099757.1	Sorghum	mosaic	virus	isolate	PAR-1620	capsid	protein	gene,	partial	cds	714
JX099758.1	Sorghum	mosaic	virus	isolate	PAR-1629	capsid	protein	gene,	partial	cds	714
JX099759.1	Sorghum	mosaic	virus	isolate	ARG-1658	capsid	protein	gene,	partial	cds	714
JX099760.1	Sorghum	mosaic	virus	isolate	ARG-1661	capsid	protein	gene,	partial	cds	714
JX099761.1	Sorghum	mosaic	virus	isolate	PAR-1628	capsid	protein	gene,	partial	cds	714
JX099762.1	Sorghum	mosaic	virus	isolate	PAR-1627	capsid	protein	gene,	partial	cds	714
JX099763.1	Sorghum	mosaic	virus	isolate	PAR-1624	capsid	protein	gene,	partial	cds	714
JX099764.1	Sorghum	mosaic	virus	isolate	PAR-1623	capsid	protein	gene,	partial	cds	714
JX099765.1	Sorghum	mosaic	virus	isolate	PAR-1622	capsid	protein	gene,	partial	cds	714
JX099766.1	Sorghum	mosaic	virus	isolate	ARG-1447	capsid	protein	gene,	partial	cds	714
JX099767.1	Sorghum	mosaic	virus	isolate	ARG-1156	capsid	protein	gene,	partial	cds	714
JX099768.1	Sorghum	mosaic	virus	isolate	ARG-1155	capsid	protein	gene,	partial	cds	714
JX099769.1	Sorghum	mosaic	virus	isolate	ARG-1154	capsid	protein	gene,	partial	cds	714
JX099770.1	Sorghum	mosaic	virus	isolate	ARG-1153	capsid	protein	gene,	partial	cds	714
JX099771.1	Sorghum	mosaic	virus	isolate	ARG-1152	capsid	protein	gene,	partial	cds	714
JX099772.1	Sorghum	mosaic	virus	isolate	ARG-985	capsid	protein	gene,	partial	cds	714
JX099773.1	Sorghum	mosaic	virus	isolate	ARG-761(07)	capsid	protein	gene,	partial	cds	714
JX099774.1	Sorghum	mosaic	virus	isolate	ARG-762(07)	capsid	protein	gene,	partial	cds	714
JX099775.1	Sorghum	mosaic	virus	isolate	ARG-763(07)	capsid	protein	gene,	partial	cds	714
DQ991391.1	Sorghum	mosaic	virus	isolate	GD-gz-so	coat	protein	gene,	partial	cds	779
EF419178.1	Sorghum	mosaic	virus	isolate	GX-nn-sh1	coat	protein	gene,	partial	cds	787
DQ991393.1	Sorghum	mosaic	virus	isolate	GD-gz-sh2	coat	protein	gene,	partial	cds	792
DQ991390.1	Sorghum	mosaic	virus	isolate	GD-bl-so	coat	protein	gene,	partial	cds	793
DQ991392.1	Sorghum	mosaic	virus	isolate	GD-gz-sh1	coat	protein	gene,	partial	cds	797
EF583924.1	Sorghum	mosaic	virus	isolate	GD-wy-sh2	coat	protein	gene,	partial	cds	806
EF419180.1	Sorghum	mosaic	virus	isolate	GX-nn-sh3	coat	protein	gene,	partial	cds	810
EF419179.1	Sorghum	mosaic	virus	isolate	GX-nn-sh2	coat	protein	gene,	partial	cds	816
KM657958.1	Sorghum	mosaic	virus	isolate	YN-ZY	coat	protein	gene,	partial	cds	828
KM999539.1	Sorghum	mosaic	virus	isolate	H4	coat	protein	gene,	partial	cds	828
KJ944736.1	Sorghum	mosaic	virus	isolate	GD-YZ2384	coat	protein	gene,	partial	cds	849
KJ944737.1	Sorghum	mosaic	virus	isolate	GD-LC5361	coat	protein	gene,	partial	cds	849
KJ944738.1	Sorghum	mosaic	virus	isolate	GD-LC5362	coat	protein	gene,	partial	cds	849
KJ944739.1	Sorghum	mosaic	virus	isolate	GD-LC500	coat	protein	gene,	partial	cds	849
KJ944740.1	Sorghum	mosaic	virus	isolate	GD-YZ596	coat	protein	gene,	partial	cds	849
KJ944741.1	Sorghum	mosaic	virus	isolate	GD-ROCXX	coat	protein	gene,	partial	cds	849
KJ944742.1	Sorghum	mosaic	virus	isolate	GD-YZ491	coat	protein	gene,	partial	cds	849
KJ944743.1	Sorghum	mosaic	virus	isolate	GD-YZ492	coat	protein	gene,	partial	cds	849
KJ944744.1	Sorghum	mosaic	virus	isolate	GD-F160	coat	protein	gene,	partial	cds	849
KJ944745.1	Sorghum	mosaic	virus	isolate	GD-GT31	coat	protein	gene,	partial	cds	849
KJ944746.1	Sorghum	mosaic	virus	isolate	GD-LC1362	coat	protein	gene,	partial	cds	849
KJ944748.1	Sorghum	mosaic	virus	isolate	GX-FN11101	coat	protein	gene,	partial	cds	849
KJ944749.1	Sorghum	mosaic	virus	isolate	GX-FN11102	coat	protein	gene,	partial	cds	849
KJ944750.1	Sorghum	mosaic	virus	isolate	GX-YT1592	coat	protein	gene,	partial	cds	849
KJ944751.1	Sorghum	mosaic	virus	isolate	GX-YT1593	coat	protein	gene,	partial	cds	849
KJ944752.1	Sorghum	mosaic	virus	isolate	GX-FNX1	coat	protein	gene,	partial	cds	849
KJ944753.1	Sorghum	mosaic	virus	isolate	GX-NN11	coat	protein	gene,	partial	cds	849
KJ944754.1	Sorghum	mosaic	virus	isolate	GX-ROC225	coat	protein	gene,	partial	cds	849
KJ944755.1	Sorghum	mosaic	virus	isolate	GX-ROC226	coat	protein	gene,	partial	cds	849
KJ944756.1	Sorghum	mosaic	virus	isolate	GX-ROC227	coat	protein	gene,	partial	cds	849
KJ944758.1	Sorghum	mosaic	virus	isolate	GX-YR189	coat	protein	gene,	partial	cds	849
KJ944759.1	Sorghum	mosaic	virus	isolate	GX-YG421	coat	protein	gene,	partial	cds	849
KJ944760.1	Sorghum	mosaic	virus	isolate	GX-YG422	coat	protein	gene,	partial	cds	849
KJ944761.1	Sorghum	mosaic	virus	isolate	GX-FN11103	coat	protein	gene,	partial	cds	849
KJ944762.1	Sorghum	mosaic	virus	isolate	GX-FN03351	coat	protein	gene,	partial	cds	849
KJ944763.1	Sorghum	mosaic	virus	isolate	GX-YG40	coat	protein	gene,	partial	cds	849
KJ944764.1	Sorghum	mosaic	virus	isolate	GX-ROC228	coat	protein	gene,	partial	cds	849
KJ944765.1	Sorghum	mosaic	virus	isolate	GX-ROC229	coat	protein	gene,	partial	cds	849
KJ944766.1	Sorghum	mosaic	virus	isolate	GX-ROC2210	coat	protein	gene,	partial	cds	849
KJ944767.1	Sorghum	mosaic	virus	isolate	GX-ROC2211	coat	protein	gene,	partial	cds	849
KJ944768.1	Sorghum	mosaic	virus	isolate	GX-YZ491	coat	protein	gene,	partial	cds	849
KJ944769.1	Sorghum	mosaic	virus	isolate	GX-YZ492	coat	protein	gene,	partial	cds	849
KJ944770.1	Sorghum	mosaic	virus	isolate	GX-YZ493	coat	protein	gene,	partial	cds	849
KJ944771.1	Sorghum	mosaic	virus	isolate	GX-YZ494	coat	protein	gene,	partial	cds	849
KJ944772.1	Sorghum	mosaic	virus	isolate	GX-LC536	coat	protein	gene,	partial	cds	849
KJ944773.1	Sorghum	mosaic	virus	isolate	GX-LC5001	coat	protein	gene,	partial	cds	849
KJ944774.1	Sorghum	mosaic	virus	isolate	GX-YG461	coat	protein	gene,	partial	cds	849
KJ944775.1	Sorghum	mosaic	virus	isolate	GX-YG462	coat	protein	gene,	partial	cds	849
KJ944777.1	Sorghum	mosaic	virus	isolate	GX-YZ407	coat	protein	gene,	partial	cds	849
KJ944778.1	Sorghum	mosaic	virus	isolate	GX-LC1365	coat	protein	gene,	partial	cds	849
KJ944779.1	Sorghum	mosaic	virus	isolate	GX-YZ258	coat	protein	gene,	partial	cds	849
KJ944782.1	Sorghum	mosaic	virus	isolate	GX-FN394	coat	protein	gene,	partial	cds	849
KJ944783.1	Sorghum	mosaic	virus	isolate	GX-GT311	coat	protein	gene,	partial	cds	849
KJ944784.1	Sorghum	mosaic	virus	isolate	GX-LC11372	coat	protein	gene,	partial	cds	849
KJ944786.1	Sorghum	mosaic	virus	isolate	GX-LZ95	coat	protein	gene,	partial	cds	849
KJ944787.1	Sorghum	mosaic	virus	isolate	GX-NN12	coat	protein	gene,	partial	cds	849
KJ944788.1	Sorghum	mosaic	virus	isolate	GX-NN13	coat	protein	gene,	partial	cds	849
KJ944789.1	Sorghum	mosaic	virus	isolate	GX-GT32	coat	protein	gene,	partial	cds	849
KJ944790.1	Sorghum	mosaic	virus	isolate	GX-ROC162	coat	protein	gene,	partial	cds	849
KJ944791.1	Sorghum	mosaic	virus	isolate	GX-LC591	coat	protein	gene,	partial	cds	849
KJ944792.1	Sorghum	mosaic	virus	isolate	GX-ROC2212	coat	protein	gene,	partial	cds	849
KJ944793.1	Sorghum	mosaic	virus	isolate	GX-Taiying5	coat	protein	gene,	partial	cds	849
KJ944794.1	Sorghum	mosaic	virus	isolate	GX-YZ495	coat	protein	gene,	partial	cds	849
KJ944795.1	Sorghum	mosaic	virus	isolate	GX-YZ5963	coat	protein	gene,	partial	cds	849
KJ944796.1	Sorghum	mosaic	virus	isolate	GX-YG39	coat	protein	gene,	partial	cds	849
KJ944797.1	Sorghum	mosaic	virus	isolate	GX-FN11104	coat	protein	gene,	partial	cds	849
KJ944798.1	Sorghum	mosaic	virus	isolate	GX-FN03352	coat	protein	gene,	partial	cds	849
KJ944799.1	Sorghum	mosaic	virus	isolate	GX-LC11373	coat	protein	gene,	partial	cds	849
KJ944800.1	Sorghum	mosaic	virus	isolate	GX-ROC2213	coat	protein	gene,	partial	cds	849
KJ944801.1	Sorghum	mosaic	virus	isolate	GX-ROC2214	coat	protein	gene,	partial	cds	849
KJ944802.1	Sorghum	mosaic	virus	isolate	GX-ROC2215	coat	protein	gene,	partial	cds	849
KJ944803.1	Sorghum	mosaic	virus	isolate	GX-YT602	coat	protein	gene,	partial	cds	849
KJ944804.1	Sorghum	mosaic	virus	isolate	GX-YZ1942	coat	protein	gene,	partial	cds	849
KJ944805.1	Sorghum	mosaic	virus	isolate	GX-LC1366	coat	protein	gene,	partial	cds	849
KJ944806.1	Sorghum	mosaic	virus	isolate	GX-LC1367	coat	protein	gene,	partial	cds	849
KJ944807.1	Sorghum	mosaic	virus	isolate	GX-YT551	coat	protein	gene,	partial	cds	849
KJ944808.1	Sorghum	mosaic	virus	isolate	GX-YT552	coat	protein	gene,	partial	cds	849
KJ944809.1	Sorghum	mosaic	virus	isolate	GX-LCX1	coat	protein	gene,	partial	cds	849
KJ944810.1	Sorghum	mosaic	virus	isolate	GX-LC5002	coat	protein	gene,	partial	cds	849
KJ944811.1	Sorghum	mosaic	virus	isolate	GX-GT22872	coat	protein	gene,	partial	cds	849
KJ944812.1	Sorghum	mosaic	virus	isolate	GX-GT23094	coat	protein	gene,	partial	cds	849
KJ944813.1	Sorghum	mosaic	virus	isolate	GX-LZXX	coat	protein	gene,	partial	cds	849
KJ944814.1	Sorghum	mosaic	virus	isolate	GX-GT994	coat	protein	gene,	partial	cds	849
KJ944815.1	Sorghum	mosaic	virus	isolate	GX-ROC2216	coat	protein	gene,	partial	cds	849
KJ944816.1	Sorghum	mosaic	virus	isolate	GX-ROC2217	coat	protein	gene,	partial	cds	849
KJ944817.1	Sorghum	mosaic	virus	isolate	GX-GT818	coat	protein	gene,	partial	cds	849
KJ944818.1	Sorghum	mosaic	virus	isolate	GX-ROC2218	coat	protein	gene,	partial	cds	849
KJ944819.1	Sorghum	mosaic	virus	isolate	GX-ROC2219	coat	protein	gene,	partial	cds	849
KJ944820.1	Sorghum	mosaic	virus	isolate	GX-GT3084	coat	protein	gene,	partial	cds	849
KJ944821.1	Sorghum	mosaic	virus	isolate	FJ-FN2011	coat	protein	gene,	partial	cds	849
KJ944825.1	Sorghum	mosaic	virus	isolate	YN-YZ1942	coat	protein	gene,	partial	cds	849
KJ944828.1	Sorghum	mosaic	virus	isolate	YN-YT236	coat	protein	gene,	partial	cds	849
KJ944829.1	Sorghum	mosaic	virus	isolate	YN-ROC224	coat	protein	gene,	partial	cds	849
KJ944747.1	Sorghum	mosaic	virus	isolate	GX-LC1364	coat	protein	gene,	partial	cds	873
KJ944757.1	Sorghum	mosaic	virus	isolate	GX-ROC161	coat	protein	gene,	partial	cds	873
KJ944776.1	Sorghum	mosaic	virus	isolate	GX-YZ234	coat	protein	gene,	partial	cds	873
KJ944780.1	Sorghum	mosaic	virus	isolate	GX-YG24	coat	protein	gene,	partial	cds	873
KJ944781.1	Sorghum	mosaic	virus	isolate	GX-YZ1413	coat	protein	gene,	partial	cds	873
KJ944785.1	Sorghum	mosaic	virus	isolate	GX-GT312	coat	protein	gene,	partial	cds	873
KJ944822.1	Sorghum	mosaic	virus	isolate	YN-YZ14133	coat	protein	gene,	partial	cds	873
KJ944823.1	Sorghum	mosaic	virus	isolate	YN-YZ14134	coat	protein	gene,	partial	cds	873
KJ944824.1	Sorghum	mosaic	virus	isolate	YN-YZ1941	coat	protein	gene,	partial	cds	873
KJ944826.1	Sorghum	mosaic	virus	isolate	YN-ROC25	coat	protein	gene,	partial	cds	873
KJ944827.1	Sorghum	mosaic	virus	isolate	YN-DZ40	coat	protein	gene,	partial	cds	873
KC179662.1	Sorghum	mosaic	virus	isolate	GX-cz-4-2	coat	protein	gene,	partial	cds	880
KC179635.1	Sorghum	mosaic	virus	isolate	GX-bh-4	coat	protein	gene,	partial	cds	892
KC179636.1	Sorghum	mosaic	virus	isolate	GX-bh-5	coat	protein	gene,	partial	cds	892
KC179664.1	Sorghum	mosaic	virus	isolate	GX-bh-6	coat	protein	gene,	partial	cds	892
KC179665.1	Sorghum	mosaic	virus	isolate	GX-bh-7	coat	protein	gene,	partial	cds	892
KC179659.1	Sorghum	mosaic	virus	isolate	GX-cz-1	coat	protein	gene,	partial	cds	912
KC179632.1	Sorghum	mosaic	virus	isolate	GX-bh-1	coat	protein	gene,	partial	cds	913
KC179633.1	Sorghum	mosaic	virus	isolate	GX-bh-2	coat	protein	gene,	partial	cds	913
KC179634.1	Sorghum	mosaic	virus	isolate	GX-bh-3	coat	protein	gene,	partial	cds	913
KC179637.1	Sorghum	mosaic	virus	isolate	GX-nn-1	coat	protein	gene,	partial	cds	913
KC179638.1	Sorghum	mosaic	virus	isolate	HN-lg-1	coat	protein	gene,	partial	cds	913
KC179639.1	Sorghum	mosaic	virus	isolate	HN-lg-2	coat	protein	gene,	partial	cds	913
KC179640.1	Sorghum	mosaic	virus	isolate	HN-lg-3	coat	protein	gene,	partial	cds	913
KC179641.1	Sorghum	mosaic	virus	isolate	HN-lg-4	coat	protein	gene,	partial	cds	913
KC179648.1	Sorghum	mosaic	virus	isolate	YN-rl-2	coat	protein	gene,	partial	cds	913
KC179650.1	Sorghum	mosaic	virus	isolate	YN-bs-6	coat	protein	gene,	partial	cds	913
KC179651.1	Sorghum	mosaic	virus	isolate	YN-bs-3	coat	protein	gene,	partial	cds	913
KC179652.1	Sorghum	mosaic	virus	isolate	YN-bs-7	coat	protein	gene,	partial	cds	913
KC179653.1	Sorghum	mosaic	virus	isolate	YN-bs-8	coat	protein	gene,	partial	cds	913
KC179656.1	Sorghum	mosaic	virus	isolate	YN-bs-10	coat	protein	gene,	partial	cds	913
KC179657.1	Sorghum	mosaic	virus	isolate	YN-lCh-6	coat	protein	gene,	partial	cds	913
KC179658.1	Sorghum	mosaic	virus	isolate	YN-lCh-4	coat	protein	gene,	partial	cds	913
KC179661.1	Sorghum	mosaic	virus	isolate	GX-cz-4-1	coat	protein	gene,	partial	cds	913
KC179666.1	Sorghum	mosaic	virus	isolate	GD-zj-1	coat	protein	gene,	partial	cds	913
KC179667.1	Sorghum	mosaic	virus	isolate	GD-zj-2	coat	protein	gene,	partial	cds	913
KC179668.1	Sorghum	mosaic	virus	isolate	GX-nn-2	coat	protein	gene,	partial	cds	913
KC179669.1	Sorghum	mosaic	virus	isolate	GX-nn-3	coat	protein	gene,	partial	cds	913
KC179670.1	Sorghum	mosaic	virus	isolate	GX-gl-1	coat	protein	gene,	partial	cds	913
KC179671.1	Sorghum	mosaic	virus	isolate	GX-gl-2	coat	protein	gene,	partial	cds	913
KC179672.1	Sorghum	mosaic	virus	isolate	GX-gl-3	coat	protein	gene,	partial	cds	913
KC179673.1	Sorghum	mosaic	virus	isolate	GX-gl-4	coat	protein	gene,	partial	cds	913
KC179674.1	Sorghum	mosaic	virus	isolate	GX-gl-5	coat	protein	gene,	partial	cds	913
KC179675.1	Sorghum	mosaic	virus	isolate	GX-gl-6	coat	protein	gene,	partial	cds	913
KC179676.1	Sorghum	mosaic	virus	isolate	GX-gl-7	coat	protein	gene,	partial	cds	913
KC179677.1	Sorghum	mosaic	virus	isolate	GX-gl-10	coat	protein	gene,	partial	cds	913
KC179678.1	Sorghum	mosaic	virus	isolate	YN-lc-1	coat	protein	gene,	partial	cds	913
KC179680.1	Sorghum	mosaic	virus	isolate	YN-lc-3	coat	protein	gene,	partial	cds	913
KC179681.1	Sorghum	mosaic	virus	isolate	YN-lc-4	coat	protein	gene,	partial	cds	913
KC179684.1	Sorghum	mosaic	virus	isolate	YN-lc-6	coat	protein	gene,	partial	cds	913
KC179685.1	Sorghum	mosaic	virus	isolate	YN-ky-2	coat	protein	gene,	partial	cds	913
KC179686.1	Sorghum	mosaic	virus	isolate	YN-lc-7	coat	protein	gene,	partial	cds	913
KC179692.1	Sorghum	mosaic	virus	isolate	YN-lc-11	coat	protein	gene,	partial	cds	913
KC179642.1	Sorghum	mosaic	virus	isolate	HN-lg-5	coat	protein	gene,	partial	cds	937
KC179643.1	Sorghum	mosaic	virus	isolate	YN-lCh-5	coat	protein	gene,	partial	cds	937
KC179644.1	Sorghum	mosaic	virus	isolate	YN-rl-1	coat	protein	gene,	partial	cds	937
KC179647.1	Sorghum	mosaic	virus	isolate	YN-lCh-3	coat	protein	gene,	partial	cds	937
KC179654.1	Sorghum	mosaic	virus	isolate	YN-bs-9-1	coat	protein	gene,	partial	cds	937
KC179660.1	Sorghum	mosaic	virus	isolate	GX-cz-2	coat	protein	gene,	partial	cds	937
KC179663.1	Sorghum	mosaic	virus	isolate	GX-lb-1-1	coat	protein	gene,	partial	cds	937
KC179679.1	Sorghum	mosaic	virus	isolate	YN-lc-2	coat	protein	gene,	partial	cds	937
KC179682.1	Sorghum	mosaic	virus	isolate	YN-ky-1	coat	protein	gene,	partial	cds	937
KC179683.1	Sorghum	mosaic	virus	isolate	YN-lc-5	coat	protein	gene,	partial	cds	937
KC179687.1	Sorghum	mosaic	virus	isolate	YN-ky-4	coat	protein	gene,	partial	cds	937
KC179689.1	Sorghum	mosaic	virus	isolate	YN-ky-5	coat	protein	gene,	partial	cds	937
KC179690.1	Sorghum	mosaic	virus	isolate	YN-lc-9	coat	protein	gene,	partial	cds	937
KC179691.1	Sorghum	mosaic	virus	isolate	YN-lc-10	coat	protein	gene,	partial	cds	937
KC179693.1	Sorghum	mosaic	virus	isolate	YN-lc-12	coat	protein	gene,	partial	cds	937
KC576803.1	Sorghum	mosaic	virus	isolate	Hainan	coat	protein	gene,	partial	cds	990
EU346724.1	Sorghum	mosaic	virus	isolate	Xingguo	nonfunctional	polyprotein	gene,	partial	sequence	795
U07219.1	Sorghum	mosaic	virus	strain	Sugarcane	mosaic	virus	H	polyprotein	(nuclear	inclusion	II	prot	2789
U57359.1	Sorghum	mosaic	virus	strain	I	polyprotein	mRNA,	partial	cds	2053
U57360.1	Sorghum	mosaic	virus	strain	M	polyprotein	mRNA,	partial	cds	2053
JX238336.1	Sorghum	mosaic	virus	isolate	PAR-1629	P3	gene,	partial	cds	425
JX238335.1	Sorghum	mosaic	virus	isolate	PAR-1620	P3	gene,	partial	cds	602
EF507717.1	Sorghum	mosaic	virus	strain	FJ7	polyprotein	gene,	partial	cds	791
DQ922903.1	Sorghum	mosaic	virus	isolate	GD-gz	polyprotein	gene,	partial	cds	800
EF507726.1	Sorghum	mosaic	virus	strain	YN3	polyprotein	gene,	partial	cds	814
EF507714.1	Sorghum	mosaic	virus	strain	GZ1	polyprotein	gene,	partial	cds	815
EF507715.1	Sorghum	mosaic	virus	strain	YN1	polyprotein	gene,	partial	cds	815
EF507718.1	Sorghum	mosaic	virus	strain	FJ8	polyprotein	gene,	partial	cds	815
EF507719.1	Sorghum	mosaic	virus	strain	FJ10	polyprotein	gene,	partial	cds	815
EF507720.1	Sorghum	mosaic	virus	strain	FJ11	polyprotein	gene,	partial	cds	815
EF507721.1	Sorghum	mosaic	virus	strain	GX1	polyprotein	gene,	partial	cds	815
EF507724.1	Sorghum	mosaic	virus	strain	YN2	polyprotein	gene,	partial	cds	815
EF507727.1	Sorghum	mosaic	virus	strain	FJ9	polyprotein	gene,	partial	cds	815
EF580920.1	Sorghum	mosaic	virus	strain	FJ12	polyprotein	gene,	partial	cds	815
EF507722.1	Sorghum	mosaic	virus	strain	GX2	polyprotein	gene,	partial	cds	816
EF507725.1	Sorghum	mosaic	virus	strain	GZ2	polyprotein	gene,	partial	cds	816
KX396438.1	Sorghum	mosaic	virus	isolate	YN-Sr-6	polyprotein	gene,	partial	cds	828
KX396439.1	Sorghum	mosaic	virus	isolate	YN-Sr-13	polyprotein	gene,	partial	cds	828
KX396440.1	Sorghum	mosaic	virus	isolate	YN-Sr-17	polyprotein	gene,	partial	cds	828
KX396441.1	Sorghum	mosaic	virus	isolate	YN-Sr-18	polyprotein	gene,	partial	cds	828
KX396442.1	Sorghum	mosaic	virus	isolate	YN-Sr-22	polyprotein	gene,	partial	cds	828
KX396443.1	Sorghum	mosaic	virus	isolate	YN-Sr-25	polyprotein	gene,	partial	cds	828
KX396444.1	Sorghum	mosaic	virus	isolate	YN-Sr-27	polyprotein	gene,	partial	cds	828
KX396445.1	Sorghum	mosaic	virus	isolate	YN-Sr-40	polyprotein	gene,	partial	cds	828
KX396446.1	Sorghum	mosaic	virus	isolate	YN-Sr-49	polyprotein	gene,	partial	cds	828
KX396447.1	Sorghum	mosaic	virus	isolate	YN-Sr-52	polyprotein	gene,	partial	cds	828
KX396448.1	Sorghum	mosaic	virus	isolate	YN-Sr-62	polyprotein	gene,	partial	cds	828
KX396449.1	Sorghum	mosaic	virus	isolate	YN-Sr-67	polyprotein	gene,	partial	cds	828
KX396450.1	Sorghum	mosaic	virus	isolate	YN-Sr-F1	polyprotein	gene,	partial	cds	828
KX396451.1	Sorghum	mosaic	virus	isolate	YN-Sr-F2	polyprotein	gene,	partial	cds	828
KX396452.1	Sorghum	mosaic	virus	isolate	YN-Sr-Q1	polyprotein	gene,	partial	cds	828
KX534067.1	Sorghum	mosaic	virus	isolate	Sr-JZ-1	polyprotein	gene,	partial	cds	828
KX534068.1	Sorghum	mosaic	virus	isolate	Sr-JZ-2	polyprotein	gene,	partial	cds	828
KX534069.1	Sorghum	mosaic	virus	isolate	Sr-JZ-3	polyprotein	gene,	partial	cds	828
KX534070.1	Sorghum	mosaic	virus	isolate	Sr-JZ-4	polyprotein	gene,	partial	cds	828
KX534071.1	Sorghum	mosaic	virus	isolate	Sr-JZ-5	polyprotein	gene,	partial	cds	828
KX534072.1	Sorghum	mosaic	virus	isolate	Sr-JZ-6	polyprotein	gene,	partial	cds	828
EF507723.1	Sorghum	mosaic	virus	strain	GZ3	polyprotein	gene,	partial	cds	833
DQ227695.1	Sorghum	mosaic	virus	isolate	GD-WY	polyprotein	gene,	partial	cds	849
KC984955.1	Sorghum	mosaic	virus	isolate	FJ-CI20032	polyprotein	gene,	partial	cds	849
KC984956.1	Sorghum	mosaic	virus	isolate	FJ-FN15	polyprotein	gene,	partial	cds	849
KC984957.1	Sorghum	mosaic	virus	isolate	FJ-FN38	polyprotein	gene,	partial	cds	849
KC984958.1	Sorghum	mosaic	virus	isolate	FJ-FN39	polyprotein	gene,	partial	cds	849
KC984959.1	Sorghum	mosaic	virus	isolate	FJ-FN3406	polyprotein	gene,	partial	cds	849
KC984960.1	Sorghum	mosaic	virus	isolate	FJ-FN5723	polyprotein	gene,	partial	cds	849
KC984961.1	Sorghum	mosaic	virus	isolate	FJ-GN70	polyprotein	gene,	partial	cds	849
KC984962.1	Sorghum	mosaic	virus	isolate	FJ-GT53	polyprotein	gene,	partial	cds	849
KC984963.1	Sorghum	mosaic	virus	isolate	FJ-LC12	polyprotein	gene,	partial	cds	849
KC984964.1	Sorghum	mosaic	virus	isolate	FJ-ROC221	polyprotein	gene,	partial	cds	849
KC984965.1	Sorghum	mosaic	virus	isolate	FJ-ROC222	polyprotein	gene,	partial	cds	849
KC984966.1	Sorghum	mosaic	virus	isolate	FJ-YC45	polyprotein	gene,	partial	cds	849
KC984967.1	Sorghum	mosaic	virus	isolate	FJ-YC66	polyprotein	gene,	partial	cds	849
KC984968.1	Sorghum	mosaic	virus	isolate	FJ-YC401	polyprotein	gene,	partial	cds	849
KC984969.1	Sorghum	mosaic	virus	isolate	FJ-YC402	polyprotein	gene,	partial	cds	849
KC984971.1	Sorghum	mosaic	virus	isolate	FJ-ZX11	polyprotein	gene,	partial	cds	849
KC984972.1	Sorghum	mosaic	virus	isolate	GD-FN15	polyprotein	gene,	partial	cds	849
KC984973.1	Sorghum	mosaic	virus	isolate	GD-GT11	polyprotein	gene,	partial	cds	849
KC984974.1	Sorghum	mosaic	virus	isolate	GD-GT467	polyprotein	gene,	partial	cds	849
KC984975.1	Sorghum	mosaic	virus	isolate	GD-GT1221	polyprotein	gene,	partial	cds	849
KC984976.1	Sorghum	mosaic	virus	isolate	GD-GT1222	polyprotein	gene,	partial	cds	849
KC984977.1	Sorghum	mosaic	virus	isolate	GD-LC136	polyprotein	gene,	partial	cds	849
KC984978.1	Sorghum	mosaic	virus	isolate	GD-LC182	polyprotein	gene,	partial	cds	849
KC984979.1	Sorghum	mosaic	virus	isolate	GD-Q208	polyprotein	gene,	partial	cds	849
KC984980.1	Sorghum	mosaic	virus	isolate	GD-ROC221	polyprotein	gene,	partial	cds	849
KC984981.1	Sorghum	mosaic	virus	isolate	GD-ROC222	polyprotein	gene,	partial	cds	849
KC984982.1	Sorghum	mosaic	virus	isolate	GD-ROC223	polyprotein	gene,	partial	cds	849
KC984983.1	Sorghum	mosaic	virus	isolate	GD-ROC224	polyprotein	gene,	partial	cds	849
KC984984.1	Sorghum	mosaic	virus	isolate	GD-YC383	polyprotein	gene,	partial	cds	849
KC984985.1	Sorghum	mosaic	virus	isolate	GD-YT177	polyprotein	gene,	partial	cds	849
KC984986.1	Sorghum	mosaic	virus	isolate	GD-YT236	polyprotein	gene,	partial	cds	849
KC984987.1	Sorghum	mosaic	virus	isolate	GD-YT861	polyprotein	gene,	partial	cds	849
KC984988.1	Sorghum	mosaic	virus	isolate	GD-YT862	polyprotein	gene,	partial	cds	849
KC984989.1	Sorghum	mosaic	virus	isolate	GD-YT1589	polyprotein	gene,	partial	cds	849
KC984990.1	Sorghum	mosaic	virus	isolate	GX-CI20031	polyprotein	gene,	partial	cds	849
KC984991.1	Sorghum	mosaic	virus	isolate	GX-FN15	polyprotein	gene,	partial	cds	849
KC984994.1	Sorghum	mosaic	virus	isolate	GX-FN393	polyprotein	gene,	partial	cds	849
KC984996.1	Sorghum	mosaic	virus	isolate	GX-GN702	polyprotein	gene,	partial	cds	849
KC984998.1	Sorghum	mosaic	virus	isolate	GX-GT122	polyprotein	gene,	partial	cds	849
KC984999.1	Sorghum	mosaic	virus	isolate	GX-GT281	polyprotein	gene,	partial	cds	849
KC985001.1	Sorghum	mosaic	virus	isolate	GX-GT2287	polyprotein	gene,	partial	cds	849
KC985002.1	Sorghum	mosaic	virus	isolate	GX-GT23091	polyprotein	gene,	partial	cds	849
KC985004.1	Sorghum	mosaic	virus	isolate	GX-GT23093	polyprotein	gene,	partial	cds	849
KC985005.1	Sorghum	mosaic	virus	isolate	GX-LC182	polyprotein	gene,	partial	cds	849
KC985006.1	Sorghum	mosaic	virus	isolate	GX-LC1137	polyprotein	gene,	partial	cds	849
KC985007.1	Sorghum	mosaic	virus	isolate	GX-LC1361	polyprotein	gene,	partial	cds	849
KC985008.1	Sorghum	mosaic	virus	isolate	GX-LC1362	polyprotein	gene,	partial	cds	849
KC985009.1	Sorghum	mosaic	virus	isolate	GX-LC1363	polyprotein	gene,	partial	cds	849
KC985010.1	Sorghum	mosaic	virus	isolate	GX-ROC28	polyprotein	gene,	partial	cds	849
KC985012.1	Sorghum	mosaic	virus	isolate	GX-ROC222	polyprotein	gene,	partial	cds	849
KC985013.1	Sorghum	mosaic	virus	isolate	GX-ROC223	polyprotein	gene,	partial	cds	849
KC985014.1	Sorghum	mosaic	virus	isolate	GX-ROC224	polyprotein	gene,	partial	cds	849
KC985016.1	Sorghum	mosaic	virus	isolate	GX-YL17	polyprotein	gene,	partial	cds	849
KC985018.1	Sorghum	mosaic	virus	isolate	GX-YL162	polyprotein	gene,	partial	cds	849
KC985020.1	Sorghum	mosaic	virus	isolate	GX-YT60	polyprotein	gene,	partial	cds	849
KC985021.1	Sorghum	mosaic	virus	isolate	GX-YT318	polyprotein	gene,	partial	cds	849
KC985022.1	Sorghum	mosaic	virus	isolate	GX-YT861	polyprotein	gene,	partial	cds	849
KC985023.1	Sorghum	mosaic	virus	isolate	GX-YT862	polyprotein	gene,	partial	cds	849
KC985024.1	Sorghum	mosaic	virus	isolate	GX-YT863	polyprotein	gene,	partial	cds	849
KC985025.1	Sorghum	mosaic	virus	isolate	GX-YZ103	polyprotein	gene,	partial	cds	849
KC985026.1	Sorghum	mosaic	virus	isolate	GX-YZ194	polyprotein	gene,	partial	cds	849
KC985029.1	Sorghum	mosaic	virus	isolate	GZ-GT11	polyprotein	gene,	partial	cds	849
KC985030.1	Sorghum	mosaic	virus	isolate	GZ-YZ45	polyprotein	gene,	partial	cds	849
KC985031.1	Sorghum	mosaic	virus	isolate	HN-FN15	polyprotein	gene,	partial	cds	849
KC985032.1	Sorghum	mosaic	virus	isolate	HN-GT127	polyprotein	gene,	partial	cds	849
KC985033.1	Sorghum	mosaic	virus	isolate	HN-MT05	polyprotein	gene,	partial	cds	849
KC985034.1	Sorghum	mosaic	virus	isolate	HN-NJ244	polyprotein	gene,	partial	cds	849
KC985035.1	Sorghum	mosaic	virus	isolate	HN-ROC221	polyprotein	gene,	partial	cds	849
KC985037.1	Sorghum	mosaic	virus	isolate	HN-YC108	polyprotein	gene,	partial	cds	849
KC985039.1	Sorghum	mosaic	virus	isolate	HN-YT65	polyprotein	gene,	partial	cds	849
KC985040.1	Sorghum	mosaic	virus	isolate	HN-YT159	polyprotein	gene,	partial	cds	849
KC985041.1	Sorghum	mosaic	virus	isolate	HN-YZ49	polyprotein	gene,	partial	cds	849
KC985043.1	Sorghum	mosaic	virus	isolate	MYA-Formosa2	polyprotein	gene,	partial	cds	849
KC985045.1	Sorghum	mosaic	virus	isolate	YN-FN39	polyprotein	gene,	partial	cds	849
KC985046.1	Sorghum	mosaic	virus	isolate	YN-GN701	polyprotein	gene,	partial	cds	849
KC985047.1	Sorghum	mosaic	virus	isolate	YN-GN702	polyprotein	gene,	partial	cds	849
KC985048.1	Sorghum	mosaic	virus	isolate	YN-GN703	polyprotein	gene,	partial	cds	849
KC985049.1	Sorghum	mosaic	virus	isolate	YN-LC136	polyprotein	gene,	partial	cds	849
KC985050.1	Sorghum	mosaic	virus	isolate	YN-LC11371	polyprotein	gene,	partial	cds	849
KC985051.1	Sorghum	mosaic	virus	isolate	YN-LC11372	polyprotein	gene,	partial	cds	849
KC985054.1	Sorghum	mosaic	virus	isolate	YN-ROC222	polyprotein	gene,	partial	cds	849
KC985055.1	Sorghum	mosaic	virus	isolate	YN-ROC223	polyprotein	gene,	partial	cds	849
KC985056.1	Sorghum	mosaic	virus	isolate	YN-YG35	polyprotein	gene,	partial	cds	849
KC985057.1	Sorghum	mosaic	virus	isolate	YN-YT158	polyprotein	gene,	partial	cds	849
KC985058.1	Sorghum	mosaic	virus	isolate	YN-YT368	polyprotein	gene,	partial	cds	849
KC985060.1	Sorghum	mosaic	virus	isolate	YN-YT1592	polyprotein	gene,	partial	cds	849
KC985061.1	Sorghum	mosaic	virus	isolate	YN-YN58	polyprotein	gene,	partial	cds	849
KC985062.1	Sorghum	mosaic	virus	isolate	YN-YZ91	polyprotein	gene,	partial	cds	849
KC985063.1	Sorghum	mosaic	virus	isolate	YN-YZ151	polyprotein	gene,	partial	cds	849
KC985064.1	Sorghum	mosaic	virus	isolate	YN-YZ211	polyprotein	gene,	partial	cds	849
KC985066.1	Sorghum	mosaic	virus	isolate	YN-YZ14132	polyprotein	gene,	partial	cds	849
KC985067.1	Sorghum	mosaic	virus	isolate	YN-YZ23321	polyprotein	gene,	partial	cds	849
KC985068.1	Sorghum	mosaic	virus	isolate	YN-YZ23322	polyprotein	gene,	partial	cds	849
KX396453.1	Sorghum	mosaic	virus	isolate	YN-Sr-11	polyprotein	gene,	partial	cds	852
KX396454.1	Sorghum	mosaic	virus	isolate	YN-Sr-54	polyprotein	gene,	partial	cds	852
KC985052.1	Sorghum	mosaic	virus	isolate	YN-ROC16	polyprotein	gene,	partial	cds	855
EU189035.1	Sorghum	mosaic	virus	isolate	TUC-h1	polyprotein	gene,	partial	cds	871
EU189036.1	Sorghum	mosaic	virus	isolate	TUC-h2	polyprotein	gene,	partial	cds	871
EU189037.1	Sorghum	mosaic	virus	isolate	TUC-h3	polyprotein	gene,	partial	cds	871
EU189038.1	Sorghum	mosaic	virus	isolate	TUC-i3	polyprotein	gene,	partial	cds	871
EU189039.1	Sorghum	mosaic	virus	isolate	TUC-m1	polyprotein	gene,	partial	cds	871
EU189040.1	Sorghum	mosaic	virus	isolate	TUC-m2	polyprotein	gene,	partial	cds	871
EU189041.1	Sorghum	mosaic	virus	isolate	TUC-i1	polyprotein	gene,	partial	cds	871
EU189042.1	Sorghum	mosaic	virus	isolate	TUC-i2	polyprotein	gene,	partial	cds	871
EU189043.1	Sorghum	mosaic	virus	isolate	TUC-i4	polyprotein	gene,	partial	cds	871
EU189044.1	Sorghum	mosaic	virus	isolate	TUC-i5	polyprotein	gene,	partial	cds	871
EU189045.1	Sorghum	mosaic	virus	isolate	TUC-i6	polyprotein	gene,	partial	cds	871
EU189046.1	Sorghum	mosaic	virus	isolate	TUC-i7	polyprotein	gene,	partial	cds	871
KC984954.1	Sorghum	mosaic	virus	isolate	FJ-CI20031	polyprotein	gene,	partial	cds	873
KC984970.1	Sorghum	mosaic	virus	isolate	FJ-YG35	polyprotein	gene,	partial	cds	873
KC984992.1	Sorghum	mosaic	virus	isolate	GX-FN391	polyprotein	gene,	partial	cds	873
KC984993.1	Sorghum	mosaic	virus	isolate	GX-FN392	polyprotein	gene,	partial	cds	873
KC984995.1	Sorghum	mosaic	virus	isolate	GX-GN701	polyprotein	gene,	partial	cds	873
KC984997.1	Sorghum	mosaic	virus	isolate	GX-GN703	polyprotein	gene,	partial	cds	873
KC985000.1	Sorghum	mosaic	virus	isolate	GX-GT649	polyprotein	gene,	partial	cds	873
KC985003.1	Sorghum	mosaic	virus	isolate	GX-GT23092	polyprotein	gene,	partial	cds	873
KC985011.1	Sorghum	mosaic	virus	isolate	GX-ROC221	polyprotein	gene,	partial	cds	873
KC985015.1	Sorghum	mosaic	virus	isolate	GX-YG35	polyprotein	gene,	partial	cds	873
KC985017.1	Sorghum	mosaic	virus	isolate	GX-YL161	polyprotein	gene,	partial	cds	873
KC985019.1	Sorghum	mosaic	virus	isolate	GX-YL163	polyprotein	gene,	partial	cds	873
KC985027.1	Sorghum	mosaic	virus	isolate	GX-YZ5961	polyprotein	gene,	partial	cds	873
KC985028.1	Sorghum	mosaic	virus	isolate	GX-YZ5962	polyprotein	gene,	partial	cds	873
KC985036.1	Sorghum	mosaic	virus	isolate	HN-ROC222	polyprotein	gene,	partial	cds	873
KC985038.1	Sorghum	mosaic	virus	isolate	HN-YT55	polyprotein	gene,	partial	cds	873
KC985042.1	Sorghum	mosaic	virus	isolate	MYA-Formosa1	polyprotein	gene,	partial	cds	873
KC985044.1	Sorghum	mosaic	virus	isolate	YN-FN21	polyprotein	gene,	partial	cds	873
KC985053.1	Sorghum	mosaic	virus	isolate	YN-ROC221	polyprotein	gene,	partial	cds	873
KC985059.1	Sorghum	mosaic	virus	isolate	YN-YT1591	polyprotein	gene,	partial	cds	873
KC985065.1	Sorghum	mosaic	virus	isolate	YN-YZ14131	polyprotein	gene,	partial	cds	873
DQ530434.1	Sorghum	mosaic	virus	isolate	Yunnan	polyprotein	gene,	partial	cds	1759
DQ925433.1	Sorghum	mosaic	virus	isolate	SrMV-VN/SC5	polyprotein	gene,	partial	cds	1813
DQ925434.1	Sorghum	mosaic	virus	isolate	SrMV-VN/SC6	polyprotein	gene,	partial	cds	1813
AJ421470.1	Sorghum	mosaic	virus	genomic	RNA	for	partial	polyprotein	gene,	isolate	ZJ	1135
AJ310191.1	Sorghum	mosaic	virus	partial	genomic	RNA	for	polyprotein	1809
AJ310192.1	Sorghum	mosaic	virus	partial	genomic	RNA	for	polyprotein	1809
AJ310193.1	Sorghum	mosaic	virus	partial	genomic	RNA	for	polyprotein	1809
AJ310194.1	Sorghum	mosaic	virus	partial	genomic	RNA	for	polyprotein	1843
AJ310195.1	Sorghum	mosaic	virus	partial	genomic	RNA	for	polyprotein	1845
AJ310196.1	Sorghum	mosaic	virus	partial	genomic	RNA	for	polyprotein	1845
KC179645.1	Sorghum	mosaic	virus	isolate	YN-lCh-1	nonfunctional	coat	protein	gene,	partial	sequence	938
KC179655.1	Sorghum	mosaic	virus	isolate	YN-bs-4	nonfunctional	coat	protein	gene,	partial	sequence	932
KC179649.1	Sorghum	mosaic	virus	isolate	YN-bs-5	nonfunctional	coat	protein	gene,	partial	sequence	913
KC179646.1	Sorghum	mosaic	virus	isolate	YN-lCh-2	nonfunctional	coat	protein	gene,	partial	sequence	893
KC179688.1	Sorghum	mosaic	virus	isolate	YN-lc-8	nonfunctional	coat	protein	gene,	partial	sequence	607
FM997897.1	Sorghum	mosaic	virus	partial	polyprotein	gene,	genomic	RNA,	isolate	YN10	1867
FM997898.1	Sorghum	mosaic	virus	partial	polyprotein	gene,	genomic	RNA,	isolate	YN11	1840
FM997899.1	Sorghum	mosaic	virus	partial	polyprotein	gene,	genomic	RNA,	isolate	YN12	1868
FM997900.1	Sorghum	mosaic	virus	partial	polyprotein	gene,	genomic	RNA,	isolate	YN13	1867
FM997901.1	Sorghum	mosaic	virus	partial	polyprotein	gene,	genomic	RNA,	isolate	YN14	1845
FM997902.1	Sorghum	mosaic	virus	partial	polyprotein	gene,	genomic	RNA,	isolate	YN15	1845
FM997903.1	Sorghum	mosaic	virus	partial	polyprotein	gene,	genomic	RNA,	isolate	YN16	1845
FM997904.1	Sorghum	mosaic	virus	partial	polyprotein	gene,	genomic	RNA,	isolate	YN17	1845
FM997905.1	Sorghum	mosaic	virus	partial	polyprotein	gene,	genomic	RNA,	isolate	YN18	1846
FM997906.1	Sorghum	mosaic	virus	partial	polyprotein	gene,	genomic	RNA,	isolate	YN19	1840
FM997907.1	Sorghum	mosaic	virus	partial	polyprotein	gene,	genomic	RNA,	isolate	YN20	1868
FM997908.1	Sorghum	mosaic	virus	partial	polyprotein	gene,	genomic	RNA,	isolate	YN21	1868
FM997909.1	Sorghum	mosaic	virus	partial	polyprotein	gene,	genomic	RNA,	isolate	YN22	1868
AX720407.1	Sequence	1	from	Patent	WO03018809	2103
NC_004035.1	Sorghum	mosaic	virus,	complete	genome	9624

## Sheet: Sheet2
>	Asparagus virus 1	>Asparagus virus 1
>	Bidens mottle virus	>Bidens mottle virus
>	Blue squill virus A	>Blue squill virus A
>	Calla lily latent virus	>Calla lily latent virus
>	Canna yellow streak virus	>Canna yellow streak virus
>	Carrot thin leaf virus	>Carrot thin leaf virus
>	Catharanthus mosaic virus	>Catharanthus mosaic virus
>	Celery mosaic virus	>Celery mosaic virus
>	Chilli ringspot virus	>Chilli ringspot virus
>	Cucurbit vein banding virus	>Cucurbit vein banding virus
>	Cyrtanthus elatus virus A	>Cyrtanthus elatus virus A
>	Habenaria mosaic virus	>Habenaria mosaic virus
>	Hardenbergia mosaic virus	>Hardenbergia mosaic virus
>	Iranian johnsongrass mosaic virus	>Iranian johnsongrass mosaic virus
>	Jasmine virus T	>Jasmine virus T
>	Narcissus late season yellows virus	>Narcissus late season yellows virus
>	Ornithogalum mosaic virus	>Ornithogalum mosaic virus
>	Passion fruit woodiness virus	>Passion fruit woodiness virus
>	Pokeweed mosaic virus	>Pokeweed mosaic virus
>	Potato virus Y strain NTN	>Potato virus Y strain NTN
>	Sunflower chlorotic mottle virus	>Sunflower chlorotic mottle virus
>	Sweet potato latent virus	>Sweet potato latent virus
>	Sweet potato virus 2	>Sweet potato virus 2
>	Sweet potato virus C	>Sweet potato virus C
>	Sweet potato virus G	>Sweet potato virus G
>	Tamarillo leaf malformation virus	>Tamarillo leaf malformation virus
>	Tomato necrotic stunt virus	>Tomato necrotic stunt virus
>	Yam mild mosaic virus	>Yam mild mosaic virus
>	Zucchini tigre mosaic virus	>Zucchini tigre mosaic virus
>	Agropyron Mosaic Virus (AMV)	>Agropyron Mosaic Virus (AMV)
>	Banana Bract Mosaic Virus (BBMV)	>Banana Bract Mosaic Virus (BBMV)
>	Basella Rugose Mosaic Virus (BRMV)	>Basella Rugose Mosaic Virus (BRMV)
>	Bean Common Mosaic Necrosis Virus (BCMNV)	>Bean Common Mosaic Necrosis Virus (BCMNV)
>	Bean common mosaic virus (BCMV)	>Bean common mosaic virus (BCMV)
>	Bean Yellow Mosaic Virus (BYMV)	>Bean Yellow Mosaic Virus (BYMV)
>	Beet mosaic virus (BMV)	>Beet mosaic virus (BMV)
>	Chiili Veinal Mottel Virus (CVMV)	>Chiili Veinal Mottel Virus (CVMV)
>	Clover Yellow Vein Virus (CYVV)	>Clover Yellow Vein Virus (CYVV)
>	Cocksfoot Streak Virus (CSV)	>Cocksfoot Streak Virus (CSV)
>	Dasheen Mosaic Virus (DasMV)	>Dasheen Mosaic Virus (DasMV)
>	East Asian Passiflora Virus (EAPV)	>East Asian Passiflora Virus (EAPV)
>	Japanese yam mosaic virus (JYMV)	>Japanese yam mosaic virus (JYMV)
>	Johnsongrass mosaic virus (JGMV)	>Johnsongrass mosaic virus (JGMV)
>	Leek Yellow Stripe Virus (LYSV)	>Leek Yellow Stripe Virus (LYSV)
>	Lettuce mosaic virus (LMV)	>Lettuce mosaic virus (LMV)
>	Lily Mottle Virus (LiMV)	>Lily Mottle Virus (LiMV)
>	Maize dwarf mosaic virus (MDMV)	>Maize dwarf mosaic virus (MDMV)
>	Moroccan Watermelon Mosaic Virus (MWMV)	>Moroccan Watermelon Mosaic Virus (MWMV)
>	Narcissus Degeneration Virus (NDV)	>Narcissus Degeneration Virus (NDV)
>	Narcissus yellow strip virus (NYSV)	>Narcissus yellow strip virus (NYSV)
>	Onion yellow dwarf virus (OYDV)	>Onion yellow dwarf virus (OYDV)
>	Papaya Leaf Distortion Mosaic Virus (PLDMV)	>Papaya Leaf Distortion Mosaic Virus (PLDMV)
>	Papaya ringspot virus (PRSV)	>Papaya ringspot virus (PRSV)
>	Pea Seed-Borne Mosaic Virus (PSBMV)	>Pea Seed-Borne Mosaic Virus (PSBMV)
>	Peanut mottle virus (PMV)	>Peanut mottle virus (PMV)
>	Peanut Stripe virus (PSV)	>Peanut Stripe virus (PSV)
>	Pennisetum mosaic virus (PeMV)	>Pennisetum mosaic virus (PeMV)
>	Pepper mottle virus (PepMV)	>Pepper mottle virus (PepMV)
>	Pepper Veinal Mottel Virus (PVMV)	>Pepper Veinal Mottel Virus (PVMV)
>	Peru Tomato Mosaic Virus (PTMV)	>Peru Tomato Mosaic Virus (PTMV)
>	Plum pox virus (PPV)	>Plum pox virus (PPV)
>	Potato virus A (PVA)	>Potato virus A (PVA)
>	Potato virus V (PVV)	>Potato virus V (PVV)
>	Potato virus Y (PVY)	>Potato virus Y (PVY)
>	Shallot Yellow Stripe Virus (SYSV)	>Shallot Yellow Stripe Virus (SYSV)
>	Sorghum mosaic virus (SMV)	>Sorghum mosaic virus (SMV)
>	Soybean mosaic virus (SMV)	>Soybean mosaic virus (SMV)
>	Sugarcane mosaic virus (SCMV)	>Sugarcane mosaic virus (SCMV)
>	Sweet Potato Feathery Mottel Virus (SPFMV)	>Sweet Potato Feathery Mottel Virus (SPFMV)
>	Thunberg Fritillary Virus (TFV)	>Thunberg Fritillary Virus (TFV)
>	Tobacco etch virus (TEV)	>Tobacco etch virus (TEV)
>	Tobacco Vein Bandling Mosaic Virus (TVBMV)	>Tobacco Vein Bandling Mosaic Virus (TVBMV)
>	Tobacco Vein Mottling Virus (TVMV)	>Tobacco Vein Mottling Virus (TVMV)
>	Turnip mosaic virus (TuMV)	>Turnip mosaic virus (TuMV)
>	Watermelon Mosaic Virus (WMV)	>Watermelon Mosaic Virus (WMV)
>	Wild Tomato Mosiac Virus (WTMV)	>Wild Tomato Mosiac Virus (WTMV)
>	Yam Mosaic Virus (YMV)	>Yam Mosaic Virus (YMV)
>	Zantedeschia Mild Mosaic Virus (ZMMV)	>Zantedeschia Mild Mosaic Virus (ZMMV)
>	Zucchini yellow mosaic virus (ZYMV)	>Zucchini yellow mosaic virus (ZYMV)

## Sheet: Sheet6
Asparagus virus 1		Asparagus_virus_1
Bidens mottle virus		Bidens_mottle_virus
Blue squill virus A		Blue_squill_virus_A
Calla lily latent virus		Calla_lily_latent_virus
Canna yellow streak virus		Canna_yellow_streak_virus
Carrot thin leaf virus		Carrot_thin_leaf_virus
Catharanthus mosaic virus		Catharanthus_mosaic_virus
Celery mosaic virus		Celery_mosaic_virus
Chilli ringspot virus		Chilli_ringspot_virus
Cucurbit vein banding virus		Cucurbit_vein_banding_virus
Cyrtanthus elatus virus A		Cyrtanthus_elatus_virus_A
Habenaria mosaic virus		Freesia_mosaic_virus
Hardenbergia mosaic virus		Habenaria_mosaic_virus
Iranian johnsongrass mosaic virus		Hardenbergia_mosaic_virus
Jasmine virus T		Hippeastrum_mosaic_virus
Narcissus late season yellows virus		Iranian_johnsongrass_mosaic_virus
Ornithogalum mosaic virus		Jasmine_virus_T
Passion fruit woodiness virus		Narcissus_late_season_yellows_virus
Pokeweed mosaic virus		Ornithogalum_mosaic_virus
Potato virus Y strain NTN		Passion_fruit_woodiness_virus
Sunflower chlorotic mottle virus		Pokeweed_mosaic_virus
Sweet potato latent virus		Potato_virus_Y_strain_NTN
Sweet potato virus 2		Sudan_watermelon_mosaic_virus
Sweet potato virus C		Sunflower_chlorotic_mottle_virus
Sweet potato virus G		Sweet_potato_latent_virus
Tamarillo leaf malformation virus		Sweet_potato_virus_2
Tomato necrotic stunt virus		Sweet_potato_virus_C
Yam mild mosaic virus		Sweet_potato_virus_G
Zucchini tigre mosaic virus		Tamarillo_leaf_malformation_virus
		Tomato_necrotic_stunt_virus
		Yam_mild_mosaic_virus
		Zucchini_tigre_mosaic_virus

## Sheet: Sheet9
Algerian Watermelon Mosaic Virus (AWMV)	2*			Agropyron Mosaic Virus (AMV)
Asparagus virus 1	3			Asparagus virus 1
Banana Bract Mosaic Virus (BBMV)	4			Banana Bract Mosaic Virus (BBMV)
Basella Rugose Mosaic Virus (BRMV)	4			Basella Rugose Mosaic Virus (BRMV)
Bean Common Mosaic Necrosis Virus (BCMNV)	13			Bean Common Mosaic Necrosis Virus (BCMNV)
Bean common mosaic virus (BCMV)	63			Bean common mosaic virus (BCMV)
Bean Yellow Mosaic Virus (BYMV)	48			Bean Yellow Mosaic Virus (BYMV)
Beet mosaic virus (BMV)	5			Beet mosaic virus (BMV)
Bidens mottle virus	7			Bidens mottle virus
Blue squill virus A	3			Blue squill virus A
Calla lily latent virus	4			Calla lily latent virus
Canna yellow streak virus	11			Canna yellow streak virus
Carrot thin leaf virus	3			Carrot thin leaf virus
Catharanthus mosaic virus	3			Catharanthus mosaic virus
Celery mosaic virus	3			Celery mosaic virus
Chiili Veinal Mottel Virus (CVMV)	14			Chiili Veinal Mottel Virus (CVMV)
Chilli ringspot virus	5			Chilli ringspot virus
Clover Yellow Vein Virus (CYVV)	8			Clover Yellow Vein Virus (CYVV)
Cocksfoot Streak Virus (CSV)	3			Cocksfoot Streak Virus (CSV)
Cucurbit vein banding virus	3			Cucurbit vein banding virus
Cyrtanthus elatus virus A	3			Cyrtanthus elatus virus A
Dasheen Mosaic Virus (DasMV)	7			Dasheen Mosaic Virus (DasMV)
East Asian Passiflora Virus (EAPV)	26			East Asian Passiflora Virus (EAPV)
Habenaria mosaic virus	3			Habenaria mosaic virus
Hardenbergia mosaic virus	9			Hardenbergia mosaic virus
Iranian johnsongrass mosaic virus	3			Iranian johnsongrass mosaic virus
Japanese yam mosaic virus (JYMV)	8			Japanese yam mosaic virus (JYMV)
Jasmine virus T	4			Jasmine virus T
Johnsongrass mosaic virus (JGMV)	5			Johnsongrass mosaic virus (JGMV)
Leek Yellow Stripe Virus (LYSV)	17			Leek Yellow Stripe Virus (LYSV)
Lettuce mosaic virus (LMV)	32			Lettuce mosaic virus (LMV)
Lily Mottle Virus (LiMV)	9			Lily Mottle Virus (LiMV)
Maize dwarf mosaic virus (MDMV)	9			Maize dwarf mosaic virus (MDMV)
Moroccan Watermelon Mosaic Virus (MWMV)	5			Moroccan Watermelon Mosaic Virus (MWMV)
Narcissus Degeneration Virus (NDV)	3			Narcissus Degeneration Virus (NDV)
Narcissus late season yellows virus	4			Narcissus late season yellows virus
Narcissus yellow strip virus (NYSV)	5			Narcissus yellow strip virus (NYSV)
Onion yellow dwarf virus (OYDV)	10			Onion yellow dwarf virus (OYDV)
Ornithogalum mosaic virus	6			Ornithogalum mosaic virus
Papaya Leaf Distortion Mosaic Virus (PLDMV)	7			Papaya Leaf Distortion Mosaic Virus (PLDMV)
Papaya ringspot virus (PRSV)	55			Papaya ringspot virus (PRSV)
Passion fruit woodiness virus	4			Passion fruit woodiness virus
Pea Seed-Borne Mosaic Virus (PSBMV)	5			Pea Seed-Borne Mosaic Virus (PSBMV)
Peanut mottle virus (PMV)	6			Peanut mottle virus (PMV)
Peanut Stripe virus (PSV)	5			Peanut Stripe virus (PSV)
Pennisetum mosaic virus (PeMV)	23			Pennisetum mosaic virus (PeMV)
Pepper mottle virus (PepMV)	24			Pepper mottle virus (PepMV)
Pepper Veinal Mottel Virus (PVMV)	5			Pepper Veinal Mottel Virus (PVMV)
Peru Tomato Mosaic Virus (PTMV)	3			Peru Tomato Mosaic Virus (PTMV)
Plum pox virus (PPV)	159			Plum pox virus (PPV)
Pokeweed mosaic virus	6			Pokeweed mosaic virus
Potato virus A (PVA)	15			Potato virus A (PVA)
Potato virus V (PVV)	6			Potato virus V (PVV)
Potato virus Y (PVY)	449			Potato virus Y (PVY)
Potato virus Y strain NTN	13			Potato virus Y strain NTN
Scallion mosaic virus (ScMV)	2*			Ryegrass Mosaic Virus (RMV)
Shallot Yellow Stripe Virus (SYSV)	3			Shallot Yellow Stripe Virus (SYSV)
Sorghum mosaic virus (SMV)	22			Sorghum mosaic virus (SMV)
Soybean mosaic virus (SMV)	101			Soybean mosaic virus (SMV)
Sugarcane mosaic virus (SCMV)	91			Sugarcane mosaic virus (SCMV)
Sunflower chlorotic mottle virus	5			Sunflower chlorotic mottle virus
Sweet Potato Feathery Mottel Virus (SPFMV)	28			Sweet Potato Feathery Mottel Virus (SPFMV)
Sweet potato latent virus	6			Sweet potato latent virus
Sweet potato virus 2	11			Sweet potato virus 2
Sweet potato virus C	22			Sweet potato virus C
Sweet potato virus G	12			Sweet potato virus G
Tamarillo leaf malformation virus	3			Tamarillo leaf malformation virus
Thunberg Fritillary Virus (TFV)	3			Thunberg Fritillary Virus (TFV)
Tobacco etch virus (TEV)	10			Tobacco etch virus (TEV)
Tobacco Vein Bandling Mosaic Virus (TVBMV)	18			Tobacco Vein Bandling Mosaic Virus (TVBMV)
Tobacco Vein Mottling Virus (TVMV)	3			Tobacco Vein Mottling Virus (TVMV)
Tomato necrotic stunt virus	3			Tomato necrotic stunt virus
Turnip mosaic virus (TuMV)	483			Turnip mosaic virus (TuMV)
Watermelon Mosaic Virus (WMV)	86			Watermelon Mosaic Virus (WMV)
Wild Tomato Mosiac Virus (WTMV)	3			Wild Tomato Mosiac Virus (WTMV)
Yam mild mosaic virus	13			Yam mild mosaic virus
Yam Mosaic Virus (YMV)	3			Yam Mosaic Virus (YMV)
Zantedeschia Mild Mosaic Virus (ZMMV)	3			Zantedeschia Mild Mosaic Virus (ZMMV)
Zucchini tigre mosaic virus	5			Zucchini tigre mosaic virus
Zucchini yellow mosaic virus (ZYMV)	90			Zucchini yellow mosaic virus (ZYMV)

## Sheet: Sheet7
CHROM	BIN_START	SNP_COUNT	VARIANTS/KB
1	0	20	400
1	50	35	700
1	100	22	440
1	150	40	800
1	200	40	800
1	250	25	500
1	300	33	660
1	350	23	460
1	400	32	640
1	450	33	660
1	500	35	700
1	550	44	880
1	600	30	600
1	650	26	520
1	700	34	680
1	750	37	740
1	800	40	800
1	850	39	780
1	900	31	620
1	950	34	680
1	1000	29	580
1	1050	32	640
1	1100	23	460
1	1150	31	620
1	1200	22	440
1	1250	23	460
1	1300	19	380
1	1350	16	320
1	1400	30	600
1	1450	24	480
1	1500	22	440
1	1550	22	440
1	1600	22	440
1	1650	22	440
1	1700	23	460
1	1750	17	340
1	1800	12	240
1	1850	21	420
1	1900	32	640
1	1950	19	380
1	2000	25	500
1	2050	18	360
1	2100	17	340
1	2150	19	380
1	2200	15	300
1	2250	18	360
1	2300	22	440
1	2350	18	360
1	2400	19	380
1	2450	19	380
1	2500	23	460
1	2550	20	400
1	2600	23	460
1	2650	25	500
1	2700	20	400
1	2750	21	420
1	2800	22	440
1	2850	20	400
1	2900	17	340
1	2950	18	360
1	3000	21	420
1	3050	12	240
1	3100	20	400
1	3150	13	260
1	3200	13	260
1	3250	44	880
1	3300	27	540
1	3350	22	440
1	3400	28	560
1	3450	23	460
1	3500	21	420
1	3550	26	520
1	3600	22	440
1	3650	21	420
1	3700	18	360
1	3750	18	360
1	3800	20	400
1	3850	27	540
1	3900	13	260
1	3950	17	340
1	4000	19	380
1	4050	16	320
1	4100	22	440
1	4150	23	460
1	4200	13	260
1	4250	18	360
1	4300	14	280
1	4350	20	400
1	4400	15	300
1	4450	21	420
1	4500	23	460
1	4550	24	480
1	4600	18	360
1	4650	18	360
1	4700	14	280
1	4750	15	300
1	4800	21	420
1	4850	18	360
1	4900	16	320
1	4950	18	360
1	5000	20	400
1	5050	21	420
1	5100	16	320
1	5150	22	440
1	5200	21	420
1	5250	18	360
1	5300	24	480
1	5350	20	400
1	5400	15	300
1	5450	19	380
1	5500	19	380
1	5550	17	340
1	5600	19	380
1	5650	19	380
1	5700	18	360
1	5750	20	400
1	5800	23	460
1	5850	22	440
1	5900	18	360
1	5950	15	300
1	6000	19	380
1	6050	13	260
1	6100	17	340
1	6150	22	440
1	6200	24	480
1	6250	18	360
1	6300	20	400
1	6350	22	440
1	6400	24	480
1	6450	20	400
1	6500	23	460
1	6550	19	380
1	6600	20	400
1	6650	29	580
1	6700	20	400
1	6750	15	300
1	6800	19	380
1	6850	18	360
1	6900	19	380
1	6950	14	280
1	7000	28	560
1	7050	14	280
1	7100	24	480
1	7150	18	360
1	7200	21	420
1	7250	18	360
1	7300	23	460
1	7350	19	380
1	7400	23	460
1	7450	24	480
1	7500	25	500
1	7550	16	320
1	7600	18	360
1	7650	19	380
1	7700	18	360
1	7750	18	360
1	7800	17	340
1	7850	19	380
1	7900	20	400
1	7950	18	360
1	8000	16	320
1	8050	14	280
1	8100	13	260
1	8150	24	480
1	8200	24	480
1	8250	23	460
1	8300	26	520
1	8350	24	480
1	8400	15	300
1	8450	17	340
1	8500	18	360
1	8550	16	320
1	8600	20	400
1	8650	27	540
1	8700	22	440
1	8750	19	380
1	8800	38	760
1	8850	27	540
1	8900	30	600
1	8950	19	380
1	9000	22	440
1	9050	17	340
1	9100	15	300
1	9150	16	320
1	9200	9	180
1	9250	11	220
1	9300	6	120
1	9350	3	60
1	9400	12	240
1	9450	12	240
1	9500	14	280
1	9550	9	180
1	9600	13	260
1	9650	6	120
1	9700	18	360
1	9750	15	300
1	9800	9	180

## Sheet: Sheet8
CHROM	BIN_START	SNP_COUNT	VARIANTS/KB
1	0	7	140
1	50	6	120
1	100	14	280
1	150	10	200
1	200	17	340
1	250	16	320
1	300	13	260
1	350	21	420
1	400	17	340
1	450	18	360
1	500	19	380
1	550	18	360
1	600	28	560
1	650	33	660
1	700	9	180
1	750	21	420
1	800	24	480
1	850	19	380
1	900	13	260
1	950	17	340
1	1000	15	300
1	1050	20	400
1	1100	21	420
1	1150	25	500
1	1200	20	400
1	1250	21	420
1	1300	28	560
1	1350	19	380
1	1400	18	360
1	1450	17	340
1	1500	16	320
1	1550	19	380
1	1600	15	300
1	1650	17	340
1	1700	14	280
1	1750	12	240
1	1800	16	320
1	1850	17	340
1	1900	13	260
1	1950	18	360
1	2000	9	180
1	2050	17	340
1	2100	8	160
1	2150	13	260
1	2200	13	260
1	2250	15	300
1	2300	14	280
1	2350	11	220
1	2400	13	260
1	2450	13	260
1	2500	13	260
1	2550	12	240
1	2600	15	300
1	2650	12	240
1	2700	16	320
1	2750	11	220
1	2800	13	260
1	2850	10	200
1	2900	10	200
1	2950	15	300
1	3000	9	180
1	3050	13	260
1	3100	14	280
1	3150	18	360
1	3200	13	260
1	3250	14	280
1	3300	12	240
1	3350	10	200
1	3400	11	220
1	3450	11	220
1	3500	14	280
1	3550	9	180
1	3600	6	120
1	3650	6	120
1	3700	5	100
1	3750	13	260
1	3800	22	440
1	3850	15	300
1	3900	13	260
1	3950	13	260
1	4000	14	280
1	4050	14	280
1	4100	17	340
1	4150	16	320
1	4200	6	120
1	4250	14	280
1	4300	10	200
1	4350	13	260
1	4400	9	180
1	4450	10	200
1	4500	17	340
1	4550	13	260
1	4600	14	280
1	4650	8	160
1	4700	9	180
1	4750	9	180
1	4800	14	280
1	4850	17	340
1	4900	13	260
1	4950	12	240
1	5000	19	380
1	5050	12	240
1	5100	16	320
1	5150	11	220
1	5200	11	220
1	5250	9	180
1	5300	18	360
1	5350	12	240
1	5400	10	200
1	5450	13	260
1	5500	11	220
1	5550	10	200
1	5600	15	300
1	5650	12	240
1	5700	13	260
1	5750	17	340
1	5800	13	260
1	5850	8	160
1	5900	12	240
1	5950	14	280
1	6000	10	200
1	6050	12	240
1	6100	9	180
1	6150	12	240
1	6200	16	320
1	6250	14	280
1	6300	18	360
1	6350	10	200
1	6400	10	200
1	6450	13	260
1	6500	10	200
1	6550	13	260
1	6600	15	300
1	6650	15	300
1	6700	16	320
1	6750	11	220
1	6800	12	240
1	6850	15	300
1	6900	16	320
1	6950	12	240
1	7000	14	280
1	7050	12	240
1	7100	16	320
1	7150	13	260
1	7200	13	260
1	7250	14	280
1	7300	19	380
1	7350	12	240
1	7400	11	220
1	7450	13	260
1	7500	12	240
1	7550	10	200
1	7600	11	220
1	7650	11	220
1	7700	11	220
1	7750	16	320
1	7800	15	300
1	7850	10	200
1	7900	16	320
1	7950	18	360
1	8000	11	220
1	8050	11	220
1	8100	12	240
1	8150	9	180
1	8200	13	260
1	8250	15	300
1	8300	9	180
1	8350	13	260
1	8400	11	220
1	8450	10	200
1	8500	12	240
1	8550	11	220
1	8600	8	160
1	8650	13	260
1	8700	11	220
1	8750	11	220
1	8800	11	220
1	8850	16	320
1	8900	13	260
1	8950	14	280
1	9000	14	280
1	9050	9	180
1	9100	13	260
1	9150	11	220
1	9200	19	380
1	9250	15	300
1	9300	10	200
1	9350	21	420
1	9400	25	500
1	9450	12	240
1	9500	10	200
1	9550	12	240
1	9600	12	240
1	9650	12	240
1	9700	12	240
1	9750	15	300
1	9800	10	200
1	9850	13	260
1	9900	9	180
1	9950	10	200
1	10000	9	180
1	10050	8	160
1	10100	2	40
1	10150	5	100
1	10200	12	240
1	10250	7	140
1	10300	10	200
1	10350	4	80

## Sheet: Protein
BIN_START	Agropyron Mosaic Virus (AMV)	Asparagus virus 1	Banana Bract Mosaic Virus (BBMV)	Basella Rugose Mosaic Virus (BRMV)	Bean Common Mosaic Necrosis Virus (BCMNV)	Bean common mosaic virus (BCMV)	Bean Yellow Mosaic Virus (BYMV)	Beet mosaic virus (BMV)	Bidens mottle virus	Blue squill virus A	Calla lily latent virus	Canna yellow streak virus	Carrot thin leaf virus	Catharanthus mosaic virus	Celery mosaic virus	Chiili Veinal Mottel Virus (CVMV)	Chilli ringspot virus	Clover Yellow Vein Virus (CYVV)	Cocksfoot Streak Virus (CSV)	Cucurbit vein banding virus	Cyrtanthus elatus virus A	Dasheen Mosaic Virus (DasMV)	East Asian Passiflora Virus (EAPV)	Habenaria mosaic virus	Hardenbergia mosaic virus	Iranian johnsongrass mosaic virus	Japanese yam mosaic virus (JYMV)	Jasmine virus T	Johnsongrass mosaic virus (JGMV)	Leek Yellow Stripe Virus (LYSV)	Lettuce mosaic virus (LMV)	Lily Mottle Virus (LiMV)	Maize dwarf mosaic virus (MDMV)	Moroccan Watermelon Mosaic Virus (MWMV)	Narcissus Degeneration Virus (NDV)	Narcissus late season yellows virus	Narcissus yellow strip virus (NYSV)	Onion yellow dwarf virus (OYDV)	Ornithogalum mosaic virus	Papaya Leaf Distortion Mosaic Virus (PLDMV)	Papaya ringspot virus (PRSV)	Passion fruit woodiness virus	Pea Seed-Borne Mosaic Virus (PSBMV)	Peanut mottle virus (PMV)	Peanut Stripe virus (PSV)	Pennisetum mosaic virus (PeMV)	Pepper mottle virus (PepMV)	Pepper Veinal Mottel Virus (PVMV)	Peru Tomato Mosaic Virus (PTMV)
0	2	1	8	20	5	36	38	8	4	2	1	3	3	3	2	30	17	9	1	14	1	27	18	7	29	3	37	0	5	24	8	12	9	13	6	13	29	25	26	12	28	2	13	16	4	11	2	1	24
50	4	0	5	13	0	37	30	7	2	7	2	32	0	0	10	28	17	5	9	7	2	32	9	17	31	12	41	0	18	29	14	12	18	8	9	13	23	29	37	13	24	4	21	11	2	30	5	2	10
100	1	0	10	21	8	28	44	5	4	6	1	10	1	2	19	29	14	4	15	1	0	17	26	3	32	15	35	0	17	33	36	18	12	10	6	20	31	43	23	18	28	4	20	14	8	35	9	1	13
150	1	0	8	23	5	44	19	1	4	9	3	11	5	2	13	32	9	8	8	3	3	19	26	5	23	5	31	0	19	37	40	18	13	9	1	13	28	40	18	30	45	3	27	12	8	25	10	0	20
200	0	0	7	14	9	42	26	8	6	7	18	8	1	0	12	27	14	6	12	10	0	20	24	4	16	6	40	0	12	34	35	12	10	12	1	12	33	39	16	31	40	0	29	17	6	26	5	1	16
250	0	1	5	10	3	43	23	5	2	3	0	2	3	2	10	22	6	5	13	9	3	25	37	5	17	2	32	0	9	42	25	6	5	8	2	9	32	45	14	18	35	0	17	10	11	7	9	1	10
300	1	0	2	3	8	44	10	2	4	4	0	2	3	1	4	10	5	2	6	0	2	27	21	1	18	1	22	0	11	19	26	8	8	5	3	8	22	41	17	22	36	1	13	6	10	11	2	0	11
350	4	0	2	11	4	40	26	3	7	1	0	4	0	1	2	19	4	3	6	1	4	20	22	4	14	0	6	0	10	23	25	4	7	0	3	2	13	26	14	32	39	0	6	8	4	7	5	0	15
400	0	0	3	10	4	38	20	7	2	9	0	1	0	2	2	17	4	4	6	4	0	8	13	0	19	2	17	0	3	26	19	4	3	3	4	1	22	18	6	26	41	3	7	8	5	8	1	1	5
450	1	1	2	6	2	24	6	6	1	3	0	0	0	0	0	3	2	2	2	5	3	12	15	2	9	0	12	0	4	23	8	6	3	1	0	0	6	23	1	18	31	1	9	0	2	5	4	0	2
500	1	0	0	1	5	20	13	2	1	1	0	0	1	0	1	8	1	0	3	2	0	2	29	2	6	3	8	0	8	31	15	0	7	2	0	1	3	16	4	11	24	0	4	5	8	2	2	0	3
550	1	0	2	5	3	21	18	1	12	3	0	0	1	0	0	8	3	0	9	1	0	7	13	19	3	0	22	0	0	23	14	2	1	0	1	2	12	26	2	18	18	4	6	8	0	2	2	1	3
600	1	0	3	1	2	16	13	2	0	3	0	0	0	2	0	2	3	0	0	0	3	5	7	3	8	1	13	0	2	14	5	3	1	0	0	1	5	25	5	9	16	0	6	1	5	0	0	1	2
650	0	0	0	0	1	9	11	0	4	2	1	0	0	1	0	1	0	0	1	0	0	5	11	1	2	2	11	0	4	9	7	0	2	0	1	1	5	11	1	5	19	2	4	2	0	2	0	0	2
700	1	0	0	1	0	17	16	0	1	0	0	0	2	0	0	3	3	1	1	1	5	2	9	1	1	5	9	0	9	16	13	0	8	0	0	0	9	20	14	7	12	3	4	2	1	5	0	0	6
750	1	0	1	12	2	7	19	4	1	3	2	0	2	0	0	12	8	1	1	9	0	2	5	1	7	0	12	0	2	13	6	3	7	0	5	3	9	14	14	7	12	5	2	7	0	1	1	1	4
800	2	0	1	0	0	4	12	2	0	1	4	0	0	0	0	12	9	1	1	4	5	2	2	1	4	3	9	0	4	11	3	2	7	1	1	4	9	5	8	4	10	8	2	0	0	2	0	1	2
850	0	0	0	7	2	4	17	1	0	4	4	0	1	0	3	19	6	2	0	2	0	9	7	3	10	3	12	0	8	8	6	5	8	0	4	2	10	9	15	1	10	14	11	1	2	2	2	0	5
900	0	0	4	3	2	16	18	2	1	0	2	0	0	0	0	20	4	3	0	5	1	6	9	10	7	3	3	0	5	22	26	8	15	1	2	5	15	18	25	1	4	8	6	4	1	9	1	1	4
950	0	0	3	6	2	17	26	7	4	5	1	0	0	0	1	31	10	5	5	13	3	16	14	8	16	0	19	0	4	19	7	9	8	4	4	5	19	26	28	11	9	19	8	5	2	4	2	2	6
1000	0	0	5	3	4	24	30	1	2	3	1	1	1	1	0	18	9	4	3	8	0	13	18	8	14	0	27	0	6	23	12	11	8	4	2	18	35	38	25	6	9	14	12	2	2	9	7	5	7
1050	0	0	2	3	8	25	25	18	3	6	2	0	0	0	2	20	8	1	2	5	0	34	16	4	23	1	20	0	3	18	7	5	3	1	3	5	24	37	19	16	7	19	17	1	2	5	3	1	7
1100	0	0	3	3	6	29	15	3	3	3	0	0	0	0	0	5	5	0	1	8	6	6	14	4	10	2	16	0	1	27	13	5	3	3	1	8	27	33	6	13	11	3	9	2	4	8	5	0	0
1150	0	0	2	4	7	28	9	0	0	0	0	23	0	0	0	6	2	1	1	5	6	19	15	0	4	3	9	0	3	21	18	1	2	1	0	4	12	7	7	14	9	9	8	4	7	4	2	0	2
1200	1	0	2	3	5	37	10	2	1	1	8	0	0	0	0	9	2	1	3	0	6	4	14	0	10	0	11	0	1	22	24	0	2	1	0	6	12	23	3	8	25	7	0	1	7	4	0	0	2
1250	1	0	0	0	4	19	19	0	1	0	0	3	1	1	0	1	0	0	1	4	0	7	4	3	3	0	6	0	1	14	10	1	2	0	0	0	9	13	11	12	12	3	6	4	3	3	0	0	1
1300	0	0	0	0	2	21	24	0	0	3	0	0	0	0	1	6	0	0	1	1	2	7	5	2	3	1	7	0	5	8	11	2	1	1	0	4	8	30	6	4	25	5	0	4	3	3	0	0	1
1350	0	0	2	2	0	15	10	0	0	1	0	1	2	0	0	6	0	0	0	1	0	3	8	6	4	0	7	0	5	9	4	3	2	0	0	1	5	25	5	7	10	3	4	10	1	0	1	0	2
1400	0	0	0	3	0	14	15	2	1	2	0	2	1	1	0	9	4	0	0	3	0	2	2	1	2	1	12	0	3	5	1	0	3	0	0	4	11	17	5	6	9	4	0	7	0	4	0	0	3
1450	0	0	1	2	0	7	5	1	0	3	2	0	1	0	2	14	0	0	0	2	4	4	5	5	6	2	9	0	2	7	6	0	2	0	0	2	9	17	7	4	12	2	0	6	1	5	1	0	1
1500	0	0	0	2	1	8	11	0	1	2	0	0	1	0	0	13	1	1	0	1	0	4	4	0	1	2	7	0	0	5	4	7	3	0	2	2	5	10	1	1	7	3	5	3	1	3	0	0	2
1550	0	0	1	2	3	11	7	0	0	4	0	0	0	0	0	7	2	1	2	1	0	7	4	1	5	4	5	0	5	7	5	0	4	0	1	0	5	13	7	4	9	2	1	2	3	4	0	0	1
1600	0	1	0	1	2	4	28	1	0	2	0	2	1	5	1	31	1	0	3	1	0	2	1	8	6	2	6	0	2	5	1	2	1	0	1	2	9	5	6	7	9	4	5	4	3	3	1	0	1
1650	0	0	3	2	1	7	11	1	1	4	0	1	2	1	0	5	1	0	1	1	2	3	3	4	8	2	11	0	3	5	4	6	3	3	0	2	10	7	3	2	9	5	1	8	0	3	3	0	2
1700	2	0	1	2	4	3	8	0	0	0	1	0	0	1	0	8	0	1	1	0	0	7	4	10	4	0	12	0	0	7	2	4	4	0	0	2	4	5	12	4	10	1	10	1	0	3	1	2	0
1750	0	0	1	3	0	19	15	4	1	0	19	3	1	0	1	22	3	1	2	0	3	8	3	5	5	4	7	0	7	5	7	1	9	1	1	1	7	10	15	7	4	5	6	3	7	2	0	0	3
1800	0	0	1	2	2	20	15	6	1	0	25	2	0	0	0	12	5	4	1	2	4	1	6	7	12	2	10	0	6	15	12	5	3	3	1	5	7	1	9	11	9	3	1	14	2	7	1	1	2
1850	1	0	1	2	3	12	13	4	1	0	2	1	0	2	0	22	4	0	2	1	9	4	2	7	5	3	19	0	2	2	2	0	12	1	3	2	12	5	6	7	16	2	4	3	3	2	1	1	2
1900	0	0	1	1	6	21	19	2	0	0	0	3	0	0	1	8	2	1	1	0	2	9	6	4	4	1	10	0	5	4	8	3	4	0	1	1	5	5	11	2	13	5	7	6	2	5	0	1	7
1950	1	3	0	2	3	15	15	2	2	2	0	1	1	1	1	10	3	1	0	0	7	1	10	2	16	3	7	0	9	19	8	11	11	0	1	6	14	9	10	7	6	6	7	8	0	9	2	3	4
2000	0	0	4	4	2	14	21	1	1	2	0	1	0	0	1	10	5	1	3	1	4	4	4	4	10	4	11	0	5	9	11	8	3	5	0	3	7	17	4	6	10	6	4	7	0	6	4	3	4
2050	0	0	3	4	1	14	10	3	5	3	0	0	0	0	1	9	6	0	0	0	4	16	13	4	3	1	14	0	2	7	5	3	3	2	2	6	11	6	6	2	14	2	17	1	3	8	2	0	3
2100	1	1	0	1	0	26	2	3	2	1	1	3	0	0	0	8	2	1	0	1	2	24	10	2	11	1	10	0	1	14	8	3	3	3	0	6	8	8	2	2	9	3	13	5	5	9	0	1	1
2150	2	0	2	2	1	17	10	0	1	1	2	1	0	1	0	3	2	0	0	2	0	5	8	6	8	3	12	0	6	17	6	1	7	1	0	2	7	12	5	8	13	3	1	1	2	10	0	0	5
2200	0	0	0	3	2	11	19	2	2	1	0	1	0	0	0	8	0	0	0	0	0	11	4	3	12	1	8	0	4	8	10	1	2	1	0	3	5	12	4	6	9	4	1	3	1	16	2	0	4
2250	0	0	0	2	1	6	13	1	2	0	1	0	0	3	0	9	3	1	2	0	1	6	1	7	11	1	9	0	4	10	5	4	1	5	1	3	7	5	5	5	14	4	2	4	1	10	1	0	4
2300	0	1	1	1	3	3	15	0	1	2	0	0	2	2	0	8	1	1	2	2	0	5	6	4	15	5	16	0	3	6	2	1	10	1	0	1	7	19	9	4	6	8	3	3	0	14	2	3	4
2350	2	0	1	2	1	10	12	0	1	1	0	4	0	2	0	6	5	0	6	2	0	12	9	4	6	4	13	0	4	10	4	1	6	3	1	2	8	14	11	3	16	6	5	14	0	15	1	15	3
2400	3	0	3	3	2	14	21	2	1	3	0	0	0	6	0	8	1	1	3	0	0	13	9	2	10	1	17	0	1	8	6	6	3	1	3	6	14	12	4	5	9	7	3	5	2	4	0	0	4
2450	0	0	1	0	1	6	23	0	0	1	0	0	0	1	1	4	1	0	0	2	0	12	5	2	1	0	10	0	0	6	4	2	3	2	0	2	8	6	6	4	15	3	4	3	1	7	0	0	1
2500	0	0	0	1	1	14	10	0	0	1	0	2	0	0	0	6	1	0	1	0	0	7	8	2	4	1	4	0	2	9	7	3	3	0	1	2	2	9	4	8	13	3	5	1	3	4	0	0	4
2550	0	0	1	0	1	9	14	0	0	0	0	3	0	0	0	7	2	0	1	0	0	3	4	8	7	4	4	0	1	14	9	1	9	0	0	4	11	10	6	4	11	2	1	3	1	7	0	0	2
2600	2	0	3	4	1	3	33	1	1	1	1	4	0	0	0	14	0	0	6	0	0	4	2	6	6	2	3	0	4	7	8	0	9	0	2	1	6	14	9	1	17	2	2	6	1	12	1	0	8
2650	4	0	3	5	1	3	37	2	1	0	0	0	2	0	1	19	5	0	4	2	11	4	3	2	16	0	17	0	1	3	2	3	5	2	1	8	18	8	3	1	10	3	5	4	0	4	5	0	5
2700	2	0	2	1	0	6	39	0	0	1	1	3	1	0	0	7	0	2	1	0	7	5	3	2	4	6	15	0	5	6	4	1	8	0	0	2	9	13	6	6	11	1	2	5	1	3	1	0	3
2750	1	1	1	2	2	11	43	2	0	4	0	22	2	3	0	20	1	1	6	2	5	12	16	11	10	10	7	0	21	5	1	5	6	0	0	0	4	15	17	4	6	9	5	11	2	6	2	1	5
2800	0	1	1	7	1	10	35	3	0	7	0	10	4	1	0	27	7	6	6	5	6	3	5	9	21	4	12	0	17	10	9	15	6	2	1	5	18	7	5	9	8	17	1	10	1	6	8	1	6
2850	0	0	4	4	1	3	25	0	1	1	0	2	0	0	3	6	1	2	3	4	4	13	2	1	2	0	33	0	5	6	7	8	1	8	2	14	23	4	5	7	14	4	3	8	1	3	4	0	3
2900	0	1	0	0	4	15	13	2	0	0	1	1	1	0	0	3	1	1	2	0	2	26	16	2	5	1	19	0	6	13	7	6	2	1	1	4	19	8	0	3	9	4	11	4	4	3	0	1	1
2950	0	0	2	1	1	32	9	1	0	0	1	0	0	3	0	3	1	2	1	0	2	21	19	2	1	1	3	0	1	33	19	4	5	1	0	2	7	11	3	7	11	0	7	1	5	1	0	0	0
3000	0	0	0	2	0	15	6	1	1	0	2	3	0	0	0	3	1	0	4	0	2	1	5	2	2	0	3	0	2	18	19	2	5	0	0	0	4	10	0	19	27	0	2	0	1	0	0	1	0
3050	0	0	0	0	1	7	1	2	1	0	0	0	0	0	1	3	0	0	1	0	3	2	4	0	8	0	2	0	1	17	4	2	0	0	0	2	6	7	0	1	32	2	0	0	1	3	2	0	0
3100	0	0	1	0	1	6	0	0	0	0	0	0	0	0	1	0	0	0	0	0	0	0	2	0	0	0	0	0	0	7	2	0	0	3	0	0	0	8	0	3	20	0	0	0	0	0	0	0	0
3150	0	0	0	0	0	8	0	0	0	0	0	0	0	0	0	0	0	0	0	0	0	1	1	0	0	0	0	0	0	3	1	0	0	0	0	0	0	21	0	1	11	0	0	0	0	0	0	0	0
3200	0	0	0	0	0	14	0	0	0	0	0	0	0	0	0	0	0	0	0	0	0	4	5	0	0	0	0	0	0	6	4	0	0	0	0	0	0	11	0	1	11	0	0	0	0	0	0	0	0
3250	0	0	0	0	0	0	0	0	0	0	0	0	0	0	0	0	0	0	0	0	0	0	0	0	0	0	0	0	0	0	2	0	0	0	0	0	0	10	0	7	7	0	0	0	0	0	0	0	0
3300	0	0	0	0	0	0	0	0	0	0	0	0	0	0	0	0	0	0	0	0	0	0	0	0	0	0	0	0	0	0	0	0	0	0	0	0	0	4	0	0	8	0	0	0	0	0	0	0	0
3350	0	0	0	0	0	0	0	0	0	0	0	0	0	0	0	0	0	0	0	0	0	0	0	0	0	0	0	0	0	0	0	0	0	0	0	0	0	6	0	0	4	0	0	0	0	0	0	0	0
3400	0	0	0	0	0	0	0	0	0	0	0	0	0	0	0	0	0	0	0	0	0	0	0	0	0	0	0	0	0	0	0	0	0	0	0	0	0	6	0	0	0	0	0	0	0	0	0	0	0
3450	0	0	0	0	0	0	0	0	0	0	0	0	0	0	0	0	0	0	0	0	0	0	0	0	0	0	0	0	0	0	0	0	0	0	0	0	0	0	0	0	0	0	0	0	0	0	0	0	0
	Agropyron Mosaic Virus (AMV)	Asparagus virus 1	Banana Bract Mosaic Virus (BBMV)	Basella Rugose Mosaic Virus (BRMV)	Bean Common Mosaic Necrosis Virus (BCMNV)	Bean common mosaic virus (BCMV)	Bean Yellow Mosaic Virus (BYMV)	Beet mosaic virus (BMV)	Bidens mottle virus	Blue squill virus A	Calla lily latent virus	Canna yellow streak virus	Carrot thin leaf virus	Catharanthus mosaic virus	Celery mosaic virus	Chiili Veinal Mottel Virus (CVMV)	Chilli ringspot virus	Clover Yellow Vein Virus (CYVV)	Cocksfoot Streak Virus (CSV)	Cucurbit vein banding virus	Cyrtanthus elatus virus A	Dasheen Mosaic Virus (DasMV)	East Asian Passiflora Virus (EAPV)	Habenaria mosaic virus	Hardenbergia mosaic virus	Iranian johnsongrass mosaic virus	Japanese yam mosaic virus (JYMV)	Jasmine virus T	Johnsongrass mosaic virus (JGMV)	Leek Yellow Stripe Virus (LYSV)	Lettuce mosaic virus (LMV)	Lily Mottle Virus (LiMV)	Maize dwarf mosaic virus (MDMV)	Moroccan Watermelon Mosaic Virus (MWMV)	Narcissus Degeneration Virus (NDV)	Narcissus late season yellows virus	Narcissus yellow strip virus (NYSV)	Onion yellow dwarf virus (OYDV)	Ornithogalum mosaic virus	Papaya Leaf Distortion Mosaic Virus (PLDMV)	Papaya ringspot virus (PRSV)	Passion fruit woodiness virus	Pea Seed-Borne Mosaic Virus (PSBMV)	Peanut mottle virus (PMV)	Peanut Stripe virus (PSV)	Pennisetum mosaic virus (PeMV)	Pepper mottle virus (PepMV)	Pepper Veinal Mottel Virus (PVMV)	Peru Tomato Mosaic Virus (PTMV)
Total SNP	44	12	125	258	157	1123	1120	146	99	139	109	176	47	51	97	756	237	97	176	158	139	622	625	263	590	149	851	0	319	936	663	279	334	137	85	268	774	1102	576	563	1047	279	415	329	166	431	125	54	283
Accessions	2	3	4	4	14	63	49	6	7	3	4	11	3	3	3	12	5	7	3	3	3	7	26	3	9	3	9	4	5	13	32	7	9	5	3	4	5	10	6	7	56	4	6	7	5	23	24	5	3
Length AA	3174	3112	3125	3079	3071	3226	3057	3058	3071	3087	3104	3040	3066	3054	3181	3089	3086	3072	3089	3168	3102	3190	3224	3054	3082	3054	3134	3073	3070	3221	3255	3096	3054	3124	3184	3098	3106	3403	3015	3269	3344	3086	3206	3099	3222	3065	3068	3074	3065
Variable positions	0.0138626	0.00385604	0.04	0.0837934	0.0511234	0.348109	0.366372	0.0477436	0.0322371	0.0450275	0.035116	0.0578947	0.0153294	0.0166994	0.0304936	0.244739	0.0767984	0.0315755	0.0569764	0.0498737	0.0448098	0.194984	0.193859	0.0861166	0.191434	0.0487885	0.271538	0	0.103909	0.290593	0.203687	0.0901163	0.109365	0.043854	0.026696	0.0865074	0.249195	0.323832	0.191045	0.172224	0.313098	0.0904083	0.129445	0.106163	0.0515208	0.14062	0.0407432	0.0175667	0.0923328
										Blue squill virus A	Calla lily latent virus	Canna yellow streak virus	Carrot thin leaf virus	Catharanthus mosaic virus	Celery mosaic virus
										3368.05	3326.04	3403.06	3163.02	3159.02	3378.03
										3	4	11	3	3	3
										#DIV/0!	1108.68	850.764	287.547	1053.01	1126.01
										9349.9	9244.45	9026.9	9016.45	9154.2	9500
										#DIV/0!	119.929	94.2477	31.8914	115.03	118.527
[truncated: 30 more columns]

[truncated: 3 more sheets: Sheet12, Nucelotide_BIN, Protein_BIN]
